## Inhibiting the prostaglandin transporter PGT induces non-canonical thermogenesis at thermoneutrality

Victor J Pai<sup>1,2</sup>, Run Lu<sup>1</sup>, Licheng Wu<sup>1</sup>, Marina Garcia Macia<sup>1</sup>, Wade R Koba<sup>3</sup>, Yuling Chi<sup>1</sup>, Rajat Singh<sup>1,4</sup>, Gary J Schwartz<sup>1,5,6</sup>, Victor L Schuster<sup>1,2,7\*</sup>

<sup>1</sup>Department of Medicine, Albert Einstein College of Medicine, Bronx, NY

<sup>2</sup>Department of Physiology and Biophysics, Albert Einstein College of Medicine, Bronx, NY

<sup>3</sup>Department of Radiology, Albert Einstein College of Medicine, Bronx, NY

<sup>4</sup>Department of Molecular Pharmacology, Albert Einstein College of Medicine, Bronx, NY

<sup>5</sup>Dominick P Purpura Department of Neuroscience, Albert Einstein College of Medicine, Bronx, NY

<sup>6</sup>Department of Psychiatry and Behavioural Science, Albert Einstein College of Medicine, Bronx, NY

<sup>7</sup>Lead contact

\*Correspondence: [victor.schuster@einstein.yu.edu](mailto:victor.schuster@einstein.yu.edu)

## ABSTRACT / SUMMARY

1  
2 Prostaglandins play fundamental roles in adipose tissue function. While prostaglandin  
3  $F_{2\alpha}$  inhibits adipogenesis, prostaglandin  $E_2$  promotes adipose beiging.  $PGF_{2\alpha}$  and  
4  $PGE_2$  are both inactivated through uptake by the plasma membrane transporter (PGT).  
5 We hypothesized that inhibiting PGT would increase  $PGF_{2\alpha}$  and  $PGE_2$  levels, thereby  
6 reducing white fat expansion and inducing beiging. Consistent with this hypothesis,  
7 inhibiting PGT in mice on high fat diet via genetic knockout or pharmacological blockade  
8 reduced body fat stores and induced thermogenesis at thermoneutrality. Inguinal white  
9 adipose tissue (iWAT) of these mice exhibited robust UCP1-independent thermogenesis  
10 characterized by mitochondrial expansion, coupling of  $O_2$  consumption to ATP  
11 synthesis, and induction of the creatine pathway. Enhanced coupled respiration  
12 persisted in PGT-KO iWAT adipocytes in a creatine shuttle-dependent manner. Thus,  
13 inhibiting PGT increases mitochondrial biogenesis and coupled respiration—each  
14 supported by the creatine pathway in a system lacking UCP1 expression—revealing  
15 PGT as a promising drug target against obesity.

16

## 17 INTRODUCTION

18 Prostaglandins are 20-carbon fatty acid signalling molecules that are released by  
19 diverse cells types, including adipocytes<sup>1-3</sup>. PGF<sub>2α</sub> and PGE<sub>2</sub> bind to their respective  
20 cell surface G protein-coupled receptors and activate a variety of downstream signalling  
21 events. Although PGF<sub>2α</sub> and PGE<sub>2</sub> are stable in plasma at 37°C, they do not function as  
22 circulating hormones. Rather, they are taken up by the broadly expressed prostaglandin  
23 reuptake carrier PGT (SLCO2a1) and delivered to a cytoplasmic oxidase for enzymatic  
24 oxidative inactivation<sup>4,5</sup>. PGT is the rate-limiting step in this two-step inactivation<sup>6</sup>. The  
25 affinities of PGF<sub>2α</sub> and PGE<sub>2</sub> for their cognate receptors and for PGT are similar;  
26 because they compete for ligand, altering the rate of PGF<sub>2α</sub> and PGE<sub>2</sub> uptake by PGT  
27 reciprocally alters the degree of receptor signalling<sup>7</sup>.

28 PGF<sub>2α</sub> and PGE<sub>2</sub> modulate adipose biology. In white adipose tissue (WAT),  
29 PGF<sub>2α</sub> binds to its Gq-coupled receptor (FP) on adipocyte precursor cells, inhibiting  
30 adipocyte differentiation and lipogenesis<sup>8</sup>. This effect is evident in humans when topical  
31 therapeutic PGF<sub>2α</sub> analogues shrink the size of periorbital fat pads<sup>9</sup>. Conversely, mice  
32 lacking PGF<sub>2α</sub> synthase exhibit increased body fat on both normal and high fat diets<sup>10</sup>.

33 In contrast, PGE<sub>2</sub> appears to play a role primarily in inducing beige fat. When  
34 cold exposure stimulates sympathetic nervous outflow, the resulting activation of  
35 adipocyte adrenergic receptors by norepinephrine stimulates white adipocytes to  
36 synthesize PGE<sub>2</sub>. The latter enhances beige conversion and expression of uncoupling  
37 protein 1 (UCP1), thereby amplifying the cold response<sup>11-14</sup>.

38 Based on these effects of PGF<sub>2α</sub> and PGE<sub>2</sub> on adipocyte biology, we  
39 hypothesized that genetically deleting PGT globally in mice ("PGT-KO") would increase

40 both systemic PGE<sub>2</sub> and PGF<sub>2α</sub>, resulting in UCP1 induction and a lean phenotype. We  
41 found that, although PGT-KO mice are lean due to beige transformation of iWAT and  
42 thermogenesis, these processes are induced at thermoneutrality and do not require  
43 UCP1. Indeed, UCP1 knockout mice develop comparable iWAT beige transformation  
44 and thermogenesis when PGT is blocked pharmacologically. Suppression of UCP1 in  
45 PG-KO mice is secondary to suppression of PPAR $\gamma$  by FP receptor activation. The  
46 findings suggest that targeting PGT therapeutically may offer a novel approach for  
47 inducing a lean phenotype without UCP1.

48

## RESULTS

### 49 **PGT global knockout mice (PGT-KO mice) exhibit a lean phenotype.**

50 Results from both male and female KO mice are presented without stratification  
51 by sex because mice of both sexes exhibited the same metabolic phenotype. PGT-KO  
52 mice had elevated urinary PGE<sub>2</sub> and PGF<sub>2α</sub> excretion rates, indicating impaired  
53 systemic prostaglandin metabolism (Figure 1A). PGT-KO mice exhibited reductions in  
54 waist circumference (Figure 1 B-D), subcutaneous white adipose tissue (WAT) (Figure 1  
55 E-F), visceral (gonadal) white adipose tissue (gWAT) (Figure 1 G-I), dermal fat (Figure 1  
56 J-L), liver steatosis (Figure 1 M,N), and whole-body fat by echo-MRI composition  
57 analysis (Figure 1 O). PGT was differentially expressed in gWAT, iWAT, and  
58 interscapular brown adipose tissue (iBAT); compared to WT mice, the masses of these  
59 three fat depots in PGT-KO mice were reduced proportional to PGT expression  
60 (Supplementary Figure 1). PGT-KO mice displayed improved glucose tolerance  
61 compared to controls (Figures 1P and Supplementary Figure 1). WAT leptin gene  
62 expression, fasting serum leptin, and fasting serum free fatty acids were reduced in  
63 PGT-KO mice, whereas fasting serum adiponectin and insulin concentrations were  
64 unchanged (Supplementary Figure 1). Histology revealed that adipocytes of PGT-KO  
65 iWAT and iBAT depots were smaller than those of WT mice, and that PGT-KO iWAT  
66 contained multilocular adipocytes (Supplementary Figure 1).

### 67 **PGT-KO mice display increased energy expenditure due to beige induction in the** 68 **iWAT depot.**

69 Although PGT-KO mice exhibited a 2-fold increase in food intake (Figures 2A  
70 and Supplementary Figure 2), there was no difference in stool weight, stool fatty acids,

71 or intestinal integrity (Supplementary Figure 2), indicating that neither reduced energy  
72 intake nor malabsorption was not the cause of the lean phenotype. Because PGT-KO  
73 mice are lean despite a higher energy intake, they must be dissipating the excess  
74 energy as work and/or heat <sup>15</sup>. Infrared beam interruption assay revealed an increase  
75 only of Y axis activity in PGT-KO mice, which was clustered at the onset of the active  
76 phase, a pattern indicative of hunger (Figure 2B) <sup>16</sup>. PGT-KO mice exhibited an increase  
77 in O<sub>2</sub> consumption (VO<sub>2</sub>) per lean body mass by indirect calorimetry (Figure 2C); under  
78 these experimental conditions, the observed change in VO<sub>2</sub> cannot be attributed to the  
79 small increase in activity <sup>17</sup>. To assess which tissues account for the whole-animal  
80 increase in thermogenesis, we injected mice with tracer deoxyglucose (F-18 FDG) and  
81 harvested tissues for analysis of uptake. Neither skeletal muscle nor interscapular  
82 brown adipose tissue (iBAT) displayed increased glucose uptake (Figure 2D). Further  
83 examination of skeletal muscle revealed no evidence for mitochondrial expansion or  
84 enhanced VO<sub>2</sub> (Supplementary Figure 2). In contrast, iWAT exhibited a significant  
85 increase in F-18 FDG uptake (Figure 2D). Moreover, iWAT tissue explants from PGT-  
86 KO mice appeared visually "browned" (Supplementary Figure 2). PGT-KO iWAT  
87 exhibited induction of mitochondrial citrate synthase activity (Figure 2E), of browning  
88 genes (except UCP1) (Figure 2F), and of VO<sub>2</sub> (Figure 2G). Extrapolating citrate  
89 synthase activity and VO<sub>2</sub> of iWAT explants to the entire iWAT fat pad, or to the whole  
90 mouse, revealed a significant thermogenic capacity of this depot in PGT-KO mice  
91 (Figure 2E,G), a finding in agreement with the F-18 FDG results. Comparable  
92 extrapolations using liver citrate synthase data were unremarkable (Supplementary  
93 Figure 2).

94 **WAT beige induction in PGT-KO mice represents "primary browning"**

95 Skin or tail disorders in mice housed at ambient temperature can cause heat  
96 loss, resulting in "secondary browning" of WAT<sup>18</sup>. To address secondary browning as  
97 phenotypic driver in PGT-KO mice, animals were tested in a water repulsion assay that  
98 detects heat loss from skin disorders<sup>19</sup>. PGT-KO mice retained less water after  
99 immersion and defended body temperature as well as control mice (Supplementary  
100 Figure 3). To further exclude secondary browning, we constructed a thermal preference  
101 assay in which mice can choose freely amongst cages held at 22°C, 27°C, or 32°C  
102 (Supplementary Figure 3)<sup>20</sup>. We validated the assay by determining the shift in thermal  
103 preference of C57BL/6J mice before and after depilation, which induces heat loss<sup>21</sup>; fur  
104 removal induced a large shift in preference to 32°C (Supplementary Figure 3). PGT wild  
105 type mice housed at 22°C and then assessed over 24 hours in the preference assay  
106 demonstrated an integrated preference for the 32°C cage, whereas similarly housed  
107 and assayed PGT-KO mice displayed a preference distribution that was shifted toward  
108 cooler cages; these behaviours were more pronounced during the inactive (light) phase  
109 than the active (dark) phase (Figure 3A). Housing mice at 32°C before subjecting them  
110 to the thermal preference assay shifted all mice toward a warmer preference in the  
111 assay compared to those housed at 22°C; nonetheless, the population time budget  
112 distribution for PGT-KO mice compared to wild type controls remained shifted overall  
113 toward a cooler preference (Figure 3B).

114 As with mice housed at 22°C, PGT-KO mice housed for 1 month at  
115 thermoneutrality (30°C) displayed increased thermogenesis compared to control mice  
116 (Figures 3C and Supplementary Figure 3). Core body temperature of PGT-KO mice

117 housed at 30°C was higher than that of control mice during the inactive and late active  
118 phases (Figure 3D). In contrast, core body temperature of PGT-KO mice housed at  
119 22°C was not different from that of control mice (Figure 3E). That PGT-KO mice  
120 dissipate their incremental heat when housed at 22°C, but not at 30°C, indicates that  
121 they have hyperthermia, rather than fever<sup>18</sup>. In accord with hyperthermia, PGT-KO mice  
122 housed at 30°C displayed reduced spontaneous activity compared to mice housed at  
123 22°C (compare Figure 3F to Figure 2B). Scholander analysis<sup>22</sup> failed to indicate heat  
124 loss in PGT-KO mice, i.e. there was no differential increase in VO<sub>2</sub> of PGT-KO mice  
125 upon reducing environmental temperature<sup>23</sup>; rather, PGT-KO mice exhibited an  
126 increase in VO<sub>2</sub> only at thermoneutrality (Figure 3G). To test further the hypothesis that  
127 PGT-KO mice housed at 30°C are thermogenic, we transferred wild type control and  
128 PGT-KO mice from 30°C housing acutely to 4°C. Control mice defended core body  
129 temperature poorly and engaged in shivering, as determined by leak of muscle creatine  
130 kinase<sup>24</sup>, whereas PGT-KO mice were able to defend body temperature with no  
131 apparent shivering (Supplementary Figure 3).

### 132 **WAT beige induction in PGT-KO mice persists on high-fat diet**

133 To render these results more translatable to human obesity<sup>25</sup>, we fed mice  
134 housed at 30°C a 60% high fat diet (HFD) for 1 month. The lean phenotype persisted  
135 under these conditions, with a reduction in body weight and total body fat and an  
136 increase in VO<sub>2</sub> per lean body mass (Supplementary Figure 3). Explants of iWAT from  
137 PGT-KO mice revealed increased O<sub>2</sub> consumption compared to controls  
138 (Supplementary Figure 3). Finally, analysis of WAT gene expression revealed an  
139 increase in brown and beige markers in iWAT, but not gWAT, of PGT-KO mice housed



140 at 30°C on HFD (Supplementary Figure 3).

### 141 **Inhibiting PGT pharmacologically reproduces the knockout phenotype**

142 To avoid possible confounding effects of altered adipose development when PGT  
143 is deleted from the single cell stage onward, as in PGT-KO mice, and to test whether  
144 inhibiting PGT on a pure C57BL/6 genetic background (as opposed to a mixed 129/BL6  
145 genetic background) also results in thermogenesis<sup>26</sup>, we administered a high-affinity  
146 PGT inhibitor<sup>27</sup> intraperitoneally to 2 month old C57BL/6J mice for 80-90 days. This  
147 phenocopied the results in PGT-KO mice as well as our previous results using a lower-  
148 affinity PGT inhibitor<sup>28</sup>, producing an increase in urinary PGE<sub>2</sub> and PGF<sub>2α</sub> excretion  
149 (compare Figure 1A and Supplementary Figure 4). In C57BL/6J mice consuming a high  
150 fat diet, pharmacological PGT inhibition caused no change in food intake, but reduced  
151 body weight gain, a change that was entirely attributable to reduced fat accretion  
152 (Supplementary Figure 4). Inhibitor-treated mice exhibited higher O<sub>2</sub> consumption rate  
153 as well as improved glucose disposal compared to vehicle-treated controls  
154 (Supplementary Figure 4). Finally, the PGT inhibitor caused induction of the beige  
155 genes Dio2 and Cidea (Supplementary Figure 4).

### 156 **Thermogenesis induced by deleting PGT is independent of UCP1**

157 The data presented so far indicate that both PGT deletion and pharmacological  
158 PGT inhibition induce browning and thermogenesis of iWAT (Figures 2 and  
159 Supplementary Figure 4). If this thermogenesis is utilizing the canonical, UCP1-  
160 mediated pathway of uncoupled respiration, then gene expression levels of UCP1 in  
161 iWAT of PGT-KO mice should be increased over WT. However, UCP1 gene expression  
162 in this depot was not elevated in PGT-KO mice housed either at 22°C (Figure 2F) or at

163 30°C (Figure 4A). Indeed, in mice exposed to 4°C acutely for 15 hours, UCP1 gene  
164 expression in PGT-KO iWAT was suppressed relative to that of WT controls (Figure  
165 4B). The lack of engagement of UCP1 in iWAT and iBAT of PGT-KO mice can be  
166 appreciated from UCP1 Q-PCR Ct values in these depots; the Ct's were numerically  
167 higher (indicating lower mRNA expression) in iWAT and iBAT of PGT-KO mice housed  
168 at 22°C and 30°C, and in iWAT of mice exposed to 4°C for 16 hours; the only exception  
169 was iBAT of PGT-KO mice after 4°C exposure (Supplementary Figure 5).

170 To explore further the concept that inhibiting PGT induces thermogenesis in the  
171 absence of UCP1 induction, we assessed the defence of core body temperature in  
172 UCP1 knockout mice (UCP1-KO)<sup>29</sup>. We housed UCP1-KO mice<sup>30</sup> at 30°C,  
173 administered vehicle (DMSO) alone, and brought them acutely to 4°C, whereupon they  
174 defended core body temperature poorly, exhibiting a mean drop of core body  
175 temperature of ~9°C over 3 hours (Figure 4C). We then administered the PGT inhibitor  
176 for 7 days and repeated the assay; the same mice now exhibited improved acute  
177 defence of core body temperature, with a mean drop in core body temperature of < 6°C  
178 at 3 hours (Figure 4C). Finally, we washed out the inhibitor for 2 weeks; the same mice  
179 reverted toward their previous state of impaired defence of core body temperature  
180 (Figure 4C). Separately, we housed UCP1-KO mice at 30°C and treated them with  
181 vehicle or PGT inhibitor. The inhibitor induced thermogenesis, as judged by indirect  
182 calorimetry and induction of the beige genes PGC1 $\alpha$ , Cidea, and Dio2 in iWAT (Figure  
183 4D-E). Thus, inhibiting PGT at thermoneutrality induces iWAT-based thermogenesis in  
184 the complete absence of UCP1.

185 **Factors contributing to suppression of iWAT UCP1 gene expression**

186 We explored two possible mechanisms for suppression of UCP1 in PGT-KO  
187 mice. First, because PGE<sub>2</sub> is known to act through inhibitory EP<sub>3</sub> receptors on  
188 sympathetic nerve endings to reduce norepinephrine release<sup>31-33</sup>, and because PGE<sub>2</sub> is  
189 elevated in PGT-KO mice (Figure 1A) and in PGT inhibitor-treated mice (Supplementary  
190 Figure 4), we measured urinary norepinephrine, an index of systemic norepinephrine  
191 release from sympathetic nerve terminals<sup>34-36</sup>. As shown in Figure 5A, urinary  
192 norepinephrine excretion was markedly reduced, both in PGT-KO mice housed at 30°C  
193 and in control mice administered the PGT inhibitor PV and housed at 22°C. As a  
194 functional correlate of these measurements, we also measured systolic and diastolic  
195 arterial blood pressure and heart rate in vehicle- and inhibitor-treated mice. As shown in  
196 Supplementary Figure 5, although the PGT inhibitor produced no change in blood  
197 pressure in these normotensive mice, a finding in accord with our previous report<sup>37</sup>,  
198 pharmacological PGT inhibition lowered resting heart rate significantly, an indicator of  
199 reduced sympathetic tone<sup>38,39</sup>. In contrast to norepinephrine, urinary epinephrine, an  
200 index of systemic epinephrine release from the adrenal medulla<sup>35</sup>, was not affected, nor  
201 was the expression in iWAT of tyrosine hydroxylase, the rate limiting step in  
202 catecholamine synthesis (Supplementary Figure 5).

203 Despite the loss of norepinephrine as a cyclic AMP agonist, protein kinase A  
204 (PKA) activity of PGT-KO iWAT exhibited only a modest reduction (Figure 5B). Because  
205 PKA in the iWAT depot of sympathectomized mice retains its ability to be activated by  
206 agonists<sup>40</sup>, the persistent PKA activity seen here in PGT-KO iWAT suggests that  
207 chronically elevated PGE<sub>2</sub> is functioning as a constitutive PKA activator<sup>12</sup> in lieu of the  
208 normal facultative adrenergic stimulus.

209 We also tested a second hypothesis, namely that suppression of iWAT UCP1  
210 gene expression is intrinsic to the PGT-KO iWAT adipocyte. We isolated the stromal  
211 vascular fraction (SVF) from iWAT of PGT-KO mice and induced differentiation into  
212 adipocytes using standard stimuli<sup>41,42</sup>. Compared to adipocytes induced from wild type  
213 control mice, adipocytes induced from PGT-KO SVF displayed undetectable PGT  
214 expression, lower expression of a "white" adipocyte phenotype (reduced Oil Red O  
215 accumulation and aP2 gene expression), and suppressed expression of UCP1 and  
216 PPAR $\gamma$  (Figure 5C-D). The reduced PPAR $\gamma$  expression of *in vitro* adipocytes (Figure  
217 5C) was confirmed in intact iWAT tissue from PGT-KO mice housed at both 22°C eating  
218 normal chow and in mice housed at 30°C eating high fat diet (Figure 5E-F). These data  
219 are consistent with a model in which the cAMP pathway in iWAT that is activated by  
220 PGE<sub>2</sub> induces PGC1 $\alpha$  expression, but the latter is incapable of increasing UCP1  
221 transcription because its co-factor PPAR $\gamma$  is suppressed<sup>43-45</sup>.

222 In considering the mechanism of iWAT PPAR $\gamma$  suppression, we noted reports  
223 that PGF<sub>2 $\alpha$</sub> , acting through its G $\alpha$ q-coupled receptor FP, suppresses PPAR $\gamma$ , and hence  
224 UCP1, gene expression<sup>3,8,46</sup>. To test the degree to which PGF<sub>2 $\alpha$</sub>  plays such a role in  
225 PGT-KO mice, we administered the specific FP receptor antagonist AL8810<sup>47-49</sup> to WT  
226 and PGT-KO mice for 4 days. Figure 5G shows that blocking FP signalling reversed the  
227 effects of PGT-KO on iWAT PPAR $\gamma$ , UCP1, and aP2 gene expression, suggesting that  
228 the rise in PGF<sub>2 $\alpha$</sub>  from PGT-KO plays a dominant role in suppressing both iWAT UCP1  
229 and the white adipocyte phenotype.

230 **Thermogenesis in PGT-KO iWAT is coupled to ATP synthesis and is associated**  
231 **with induction of the creatine shuttle pathway which, in turn, is dependent upon**

## 232 **signalling through the PGF<sub>2α</sub> receptor**

233           Because UCP1 is not induced in PGT-KO iWAT, the incremental thermogenesis  
234 is unlikely to be uncoupled from ATP synthesis, as is the case with UCP1-derived  
235 thermogenesis. We examined this question directly by determining the O<sub>2</sub> consumption  
236 rate of iWAT explants from WT and PGT-KO mice before and after inhibiting ATP  
237 synthase with oligomycin. These measurements revealed that the increment in iWAT O<sub>2</sub>  
238 consumption is coupled to ATP synthesis (Figure 6A-B). In addition to the induction of  
239 iWAT browning genes in the absence of UCP1<sup>50</sup>, induction of elements of the classical  
240 creatine shuttle in this setting have also been reported<sup>24</sup>. Here, iWAT of PGT-KO mice  
241 housed at thermoneutrality displayed induction of genes encoding the creatine  
242 transporter *Slc6a8* and mitochondrial creatine kinases *Ckmt1* and *Ckmt2* (Figure 6C).  
243 Inhibiting PGT pharmacologically in C57BL/6 mice housed at 30°C induced *Ckmt1* and  
244 *Ckmt2* in iWAT (Figure 6D). In UCP1-KO mice housed under the same conditions, the  
245 PGT inhibitor induced iWAT expression of *Ckmt1* and *Slc6a8* (Figure 6E), indicating  
246 that cold exposure of UCP1-KO mice is not required for induction of creatine shuttle  
247 components. To test the hypothesis that the creatine pathway contributes to whole-  
248 mouse thermogenesis in PGT-KO mice, we administered the *Slc6a8* transporter  
249 inhibitor β-guanidinopropionic acid (β-GPA) systemically as reported<sup>24</sup>, however, we  
250 were unable to normalize the augmented VO<sub>2</sub> of PGT-KO mice in this manner  
251 (Supplementary Figure 6).

252           Because the PGF<sub>2α</sub> receptor FP plays a key role in suppressing UCP1 gene  
253 expression in PGT-KO mice (Figure 5G), we also explored the role of FP in control of  
254 the creatine shuttle pathway. Administering the FP antagonist AL8810 to PGT-KO mice

255 reversed the induction of iWAT Ckmt1, Ckmt2, and Slc6a8 (Figure 6F). In addition to  
256 genes of the creatine shuttle, the muscle genes Serca1 (*Atp2b1*) and *Myf5* and were  
257 also induced in iWAT of PGT-KO mice, as were a number of genes of fatty acid  $\beta$ -  
258 oxidation (Supplementary Figure 6). In contrast, there was no induction of genes  
259 involved in either lipolysis or lipogenesis (Supplementary Figure 6).

### 260 **Thermogenesis in PGT-KO iWAT beige adipocytes is dependent upon creatine**

261 To explore further the mechanism of thermogenesis in PGT-KO iWAT, we used  
262 adipocytes induced *in vitro* from the stromal vascular fraction. As with iWAT explants,  
263 adipocytes induced *in vitro* from PGT-KO iWAT exhibited an increase in coupled  
264 respiration (Figure 7 A-B) and induction of the creatinine shuttle gene Ckmt2 (Figure  
265 7C). We validated  $\beta$ -GPA as an effective tool in *in vitro* by confirming its ability to inhibit  
266 O<sub>2</sub> consumption in adipocytes derived from UCP1-KO mice<sup>24</sup> (Figure 7D). When  
267 applied to adipocytes derived from WT mice,  $\beta$ -GPA had no effect on O<sub>2</sub> consumption,  
268 however,  $\beta$ -GPA returned the increased O<sub>2</sub> consumption rate of PGT-KO adipocytes to  
269 control levels (Figure 7E), indicating a functional role for the creatine shuttle in the non-  
270 UCP1-mediated thermogenesis of PGT-KO iWAT beige adipocytes.

271 **DISCUSSION**

272 The present studies demonstrate that genetically deleting, or pharmacologically  
273 inhibiting, the prostaglandin uptake carrier PGT in mice induces primary thermogenesis  
274 and reduced fat accretion in multiple adipose depots and in liver. Tissue-specific  
275 glucose uptake, O<sub>2</sub> consumption, and gene expression changes indicate that the  
276 increased thermogenesis owes, at least in part, to beige transformation of  
277 subcutaneous inguinal white adipose tissue (iWAT). Thermogenesis in PGT-KO iWAT  
278 does not derive from canonical UCP1-based uncoupled respiration. Rather, UCP1 gene  
279 expression that might otherwise be stimulated by PGC-1 $\alpha$  is, instead, suppressed due  
280 to activation of the PGF<sub>2 $\alpha$</sub>  receptor. The incremental respiration is coupled to ATP  
281 synthesis ("non-canonical thermogenesis") and is accompanied by induction of the  
282 creatine shuttle pathway, which is functionally necessary for the increased respiration.

283 **Primary thermogenesis in PGT-KO mice**

284 A compelling argument has been adduced that many cases of beige induction in  
285 mice housed at ambient temperatures are not primary, but rather are secondary due to  
286 heat loss through skin, fur, or tail<sup>18</sup>. We addressed this issue in several complementary  
287 ways. First, PGT-KO mice exhibit normal water repulsion and a behavioural preference  
288 for a cooler, rather than warmer, environment, especially during the inactive phase.  
289 Second, Scholander curves on PGT-KO mice are inconsistent with heat loss. Third,  
290 PGT-KO mice housed at thermoneutrality maintain an increase of whole-mouse and  
291 iWAT O<sub>2</sub> consumption, as well as induction of browning genes in iWAT. Fourth, the  
292 response of core body temperature in PGT-KO mice to changes in ambient temperature  
293 indicates that they have hyperthermia, not fever. Finally, the thermogenic pathway

294 activated in PGT-KO mice at 30°C serves to defend PGT-KO mice from acute cold  
295 exposure, obviating the need to shiver. Taken together, the data argue strongly that  
296 iWAT beige induction in PGT-KO mice is primary and not secondary.

### 297 **Stimulation of mitochondriogenesis and coupled respiration**

298         Recent studies have demonstrated that PGE<sub>2</sub> plays an amplifying role in the so-  
299 called "canonical", or UCP1-mediated, thermogenic response of WAT to cold exposure  
300 <sup>11,12</sup>. Specifically, norepinephrine increases cyclic AMP levels directly by activating β3-  
301 adrenergic receptors, and indirectly by inducing PGE<sub>2</sub> synthesis that, itself, activates the  
302 same signalling cascade via EP<sub>4</sub> receptors <sup>12</sup>. By increasing systemic levels of PGE<sub>2</sub> in  
303 PGT-KO mice, we hypothesized that the cyclic AMP pathway in mice housed under mild  
304 thermal stress (22°C) would be enhanced. Surprisingly, protein kinase A activity in iWAT  
305 of these PGT-KO mice was not increased, rather it was only moderately decreased.  
306 One possible explanation for this result is that systemic norepinephrine release, as  
307 determined by urinary excretion <sup>34,35</sup>, was markedly suppressed in PGT-KO mice and in  
308 mice administered a PGT inhibitor. This result is in accord with the known ability of  
309 PGE<sub>2</sub> to suppress norepinephrine release from sympathetic nerve termini via EP<sub>3</sub>  
310 receptors <sup>31-33</sup>. Together, the data suggest that elevating PGE<sub>2</sub> constitutively by blocking  
311 its metabolism directly stimulates the iWAT cAMP - protein kinase A pathway, while at  
312 the same time inhibiting facultative activation of this pathway by adrenergic agonists.  
313 The net result is constitutive activation of mitochondriogenesis, an increase in coupled  
314 respiration, and induction of genes of fatty acid β-oxidation.

### 315 **Constraints on UCP1 gene expression in PGT-KO iWAT**

316         Whereas deleting PGT increased the expression of a broad array of iWAT



317 browning genes in mice housed both at 30°C and 22°C, *Ucp1* gene expression was  
318 strongly suppressed, and could not be induced even by 16 hrs of exposure to 4°C.  
319 Although administering exogenous PGE<sub>2</sub> alone to mice induces *Ucp1* in WAT<sup>12</sup>,  
320 inhibiting PGT increases both PGF<sub>2α</sub> and PGE<sub>2</sub>. In WAT, PGF<sub>2α</sub> suppresses white  
321 adipocyte differentiation as well as *Ucp1* expression<sup>3,8,10,51-53</sup>. Both effects result from  
322 PGF<sub>2α</sub> inhibiting PPARγ gene expression and function<sup>8,54,55</sup>. In keeping with these  
323 known effects of PGF<sub>2α</sub>, PPARγ mRNA was reduced both in whole iWAT of PGT-KO  
324 mice and in adipocytes derived *in vitro* from PGT-KO iWAT, and blocking the PGF<sub>2α</sub>  
325 receptor in PGT-KO mice rescued *Ucp1* gene expression. Experiments by Klepac et al  
326 indicate that directly stimulating the g protein Gαq, which is coupled to the PGF<sub>2α</sub>  
327 receptor FP, also suppresses PPARγ and UCP1<sup>46</sup>. Because high concentrations of  
328 PGE<sub>2</sub> can engage the EP<sub>1</sub> receptor, which also signals through Gαq to suppress  
329 PPARγ<sup>3,14</sup>, it is possible that elevated levels of PGE<sub>2</sub> may also have contributed to  
330 suppressing *Ucp1*. Taken together, the data are consistent with a model in which  
331 increased levels of PGE<sub>2</sub> and PGF<sub>2α</sub> stimulate iWAT expression of PGC1α,  
332 mitochondrial expansion, and expression of browning genes while simultaneously  
333 inhibiting expression of the PGC1α binding partner PPARγ, and thus UCP1 expression  
334 (Supplementary Figure 7). Despite the relatively low capacity of beige adipocyte  
335 mitochondria for ATP synthesis<sup>56</sup>, the significant expansion of mitochondrial mass in  
336 iWAT of PGT-KO mice appears sufficient to support an increase in coupled O<sub>2</sub>  
337 consumption. In this regard, it is noteworthy that both the Scholander curves and the  
338 modest increase in core body temperature at thermoneutrality, but not ambient,  
339 temperature of PGT-KO mice resemble those of voles bred for high aerobic capacity

340 that have a 7% higher mass-adjusted basal metabolic rate compared to controls <sup>57,58</sup>.

### 341 **Role of genetic strain and thermoneutrality**

342 Although UCP-KO mice on either a pure C57BL/6J or a pure 129/SvImJ genetic  
343 background are markedly cold-sensitive, UCP1-KO mice on a mixed 129xBL/6  
344 background are cold-resistant <sup>50,59,60</sup>. Similarly, in the present studies, PGT-KO mice on  
345 a mixed 129xBL/6 background exhibited thermogenesis with improved cold tolerance  
346 despite suppression of UCP1. Importantly, by inhibiting PGT pharmacologically at  
347 thermoneutrality, thermogenesis and improved cold tolerance could be induced in mice  
348 on a pure C57BL/6J background, indicating that neither an F1 mixed genetic  
349 background nor cold exposure is required for the PGT inhibition effects. Although over-  
350 expressing cyclooxygenase-2 or adenosine monophosphate-activated protein kinase  
351 (AMPK) in mice housed at thermoneutrality has been reported to protect against diet-  
352 induced obesity <sup>11,61,62</sup>, in the present model leanness, thermogenesis, and improved  
353 cold tolerance were all induced under thermoneutral conditions.

### 354 **Beige adipocyte types, creatine pathway, and cellular mechanisms responsible** 355 **for UCP1-independent thermogenesis in PGT-KO iWAT**

356 PGT mRNA in iWAT is expressed in an adipocyte precursor population <sup>63</sup>. This  
357 cell specificity would position PGT for paracrine control <sup>7</sup> of white or beige adipogenesis.  
358 Further work is required to delineate both the target cell(s) of PGE<sub>2</sub> and PGF<sub>2α</sub>  
359 paracrine signalling in the iWAT depot, as well as the characteristics of the resulting  
360 beige adipocytes, especially since recent evidence suggests that a number of novel  
361 subtypes of beige adipocytes may exist <sup>24,64-69</sup>. To the extent that PGT-KO iWAT  
362 expresses components of the creatine shuttle, Myf5, and SERCA1, the corresponding

363 thermogenic beige adipocytes may represent yet another novel cell type.

364       The inhibition of oxygen consumption by  $\beta$ -GPA in PGT-KO iWAT adipocytes *in*  
365 *vitro* is consistent with an emerging role of the creatine shuttle in beige adipocyte  
366 thermogenesis, especially in the absence of UCP1-mediated, uncoupled respiration  
367 <sup>24,64,65,70</sup>. Although the creatine pathway was initially identified in beige adipocytes  
368 derived from UCP1-KO mice, suggesting that UCP1 and the pathway vary reciprocally  
369 <sup>24</sup>, the present results indicate that  $\text{PGF}_{2\alpha}$  may independently regulate this pathway, at  
370 least in the absence of PGT. Thus, the  $\text{PGF}_{2\alpha}$  receptor inhibitor simultaneously  
371 increased gene expression of UCP1 in PGT-KO iWAT (Figure 5G) while suppressing  
372 expression of creatine shuttle genes (Figure 6F). The lack of an effect of  $\beta$ -GPA on  
373 thermogenesis in intact mice (present study in PGT-KO mice, and <sup>61</sup>) may reflect  
374 pharmacodynamic issues, or may indicate that the contribution of iWAT to overall  
375 thermogenesis in these models is less than that of other depots or tissues.

376       UCP1-independent thermogenesis by beige adipocytes requires activation of an  
377 alternative futile cycle <sup>71</sup>. Candidates for the latter that have been put forward include  
378 uncoupling of sarcoendoplasmic reticulum calcium ATPase (SERCA) <sup>69</sup> and cycling of  
379 lipolysis-lipogenesis <sup>72</sup>. The futile cycle(s) generating heat in iWAT of PGT-KO mice  
380 remain(s) to be identified.

381       The proposed model for PGT-KO iWAT is shown in Supplementary Figure 7. In  
382 this model, increased  $\text{PGE}_2$  in PGT-KO mice inhibits facultative norepinephrine release  
383 from sympathetic nerve terminals,  $\text{PGE}_2$  can still activate cAMP signalling constitutively  
384 to induce  $\text{PGC1}\alpha$  activation and mitochondrial biogenesis. Increased  $\beta$  oxidation of  
385 fatty acids drives increased ATP synthesis by the expanded mitochondrial pool. The

386 accompanying increase in  $\text{PGF}_{2\alpha}$  in PGT-KO mice activates the receptor FP which, via  
387  $\text{G}\alpha_q$  signalling, reduces UCP1 gene expression by inhibiting  $\text{PPAR}\gamma$  gene expression  
388 and induces components of the creatine shuttle. The increased ATP synthesis, via the  
389 creatine shuttle, supports UCP1-independent thermogenesis via (unidentified) futile  
390 cycle(s).

### 391 **Therapeutic implications**

392 Although activating UCP1-mediated thermogenesis in humans obesity seems  
393 theoretically sound, in practice it has been difficult to activate UCP1 in subjects who are  
394 obese or beyond their young adult years, or to translate activation into meaningful  
395 weight loss in the target population <sup>73</sup>. Instead, it has been argued that non-canonical  
396 thermogenesis is less efficient than UCP1-mediated thermogenesis <sup>74</sup>, and therefore  
397 may be a preferable therapeutic pathway to target. The present results provide  
398 evidence that pharmacologically inhibiting PGT induces robust WAT non-canonical  
399 thermogenesis in mice housed at thermoneutrality and consuming a high fat diet, that is  
400 conditions mimicking those of obese human subjects. These findings raise PGT as a  
401 promising drug target against obesity.

402

403

## METHODS

404 **Animals:** All animal procedures were performed under the guidelines of Albert Einstein  
405 College of Medicine's Institutional Animal Care and Use Committee. The generation and  
406 rescue of PGT-KO mice were as reported previously <sup>76</sup>. Animals were either housed at  
407 22°C or 30°C, and fed either chow (5058, LabDiet, St. Louis, MO, USA) or high fat diet  
408 (D12492, Research Diets, New Brunswick, NJ, USA) depending on experimental  
409 conditions. PGT-KO mice are on a mixed 129/BL6 background. Wild type mice of the  
410 same genetic background were used as controls. For inhibitor studies, C57BL/6J wild  
411 type, and UCP1 knockout mice (B6.129-*Ucp1*<sup>tm1Kz/J</sup>), were obtained from Jackson  
412 Laboratory (Bar Harbor, ME).

413 The PGT inhibitor PV-02076 <sup>27</sup> was dissolved in DMSO and injected intraperitoneally at  
414 a dose of 20 mg/kg, with DMSO as a vehicle control. Mouse tissue was either fixed in  
415 10% phosphate buffered formalin followed by 70% ethanol for sectioning and staining  
416 with hematoxylin and eosin, or was snap-frozen in liquid nitrogen and stored at -80°C.  
417 Mouse whole blood was collected by retro-orbital bleeding and allowed to coagulate at  
418 room temperature. Serum was collected by centrifuging whole blood samples at 5000 x  
419 g for 10 minutes. Samples were sent to the University of Cincinnati Mouse Metabolic  
420 Phenotype Centre, where serum free fatty acids, adiponectin, leptin levels were  
421 measured. Mouse liver triglyceride levels were measured by colorimetric assay  
422 according to manufacturer instructions (Cat# 10010303, Cayman Chemical, Ann Arbor,  
423 Michigan, USA). For food and water intake measurements, mice were housed  
424 individually, and food/water intake was measured daily for one week. Body fat  
425 composition was measured by echoMRI (Echo Medical Systems, Houston, Texas). CT

426 studies were performed under isoflurane anaesthesia. Urine PGE<sub>2</sub> and PGF<sub>2α</sub> were  
427 measured by ELISA (Cayman Chemical); urine for these assays as well as stool for the  
428 assays below were collected by housing mice in metabolic cages over 2 weeks and  
429 samples were stored at -80°C. Urine creatinine was measured by LC-MS at the  
430 University of Alabama at Birmingham O'Brien Center Bioanalytical Core. Urine  
431 epinephrine and norepinephrine, collected from spot samples between 11:00 AM and  
432 2:00 PM, were measured by ELISA (NBP2-62867, NOVUS Biologicals; BA E-6200,  
433 Rocky Mountain Diagnostics, Colorado Springs, Colorado, respectively) and normalized  
434 to urinary creatinine. Tissue protein kinase A (PKA) activity was measured according to  
435 the manufacturer's instructions (Abcam #ab139435, Cambridge, MA). Stool non-  
436 esterified free fatty acid content was measured colorimetrically (HR Series NEFA-HR(2),  
437 Wako Diagnostics, Richmond, VA). Indirect calorimetry was performed in individually  
438 housed animals over 2 weeks in temperature controlled settings (Columbus  
439 Instruments, Columbus, OH), where consumption rates of O<sub>2</sub> (VO<sub>2</sub>) and CO<sub>2</sub> (VCO<sub>2</sub>),  
440 respiratory exchange ratio (RER), energy expenditure (EE), locomotion (infrared beam  
441 breaks), and core body temperature (by intra-abdominal probes, Columbus Instruments,  
442 Columbus, OH) were collected simultaneously. Core body temperature was also  
443 collected outside of calorimetry cages (SubCue dataloggers, Canadian Analytical  
444 Technologies Inc., Calgary, Alberta, Canada). For Scholander plot analysis, mice were  
445 acclimated in indirect calorimetry chambers for 2 days before starting the experiment.  
446 Cage temperature steps were 10°C, 15°C, 20°C, 25°C, 27°C, 30°C, and 33°C at 2-hour  
447 intervals per step. Only data from the second hour at each temperature were used for  
448 analysis. For each mouse cohort, Scholander analysis was done at least 3 times

449 consecutively over 3 days and was compiled as averages. For  $\beta$ -guanidino propionic  
450 acid ( $\beta$ -GPA) calorimetry experiments, WT and KO mice housed in indirect calorimetry  
451 chambers at 30°C and were given vehicle control daily by IP injections. After baseline  
452 data were collected for one week, 0.4 g/kg  $\beta$ -GPA was given daily by IP injections and  
453 calorimetry data were collected for one week.

454 **Oral glucose tolerance test:** Mice were fasted for 6 hours before injection with 2 g/kg  
455 glucose by oral gavage for oral glucose tolerance test (GTT). Blood glucose was  
456 measured at 15, 30, 60, 90, and 120 minutes post injection.

457 **F-18 fluorodeoxyglucose (F-18 FDG) uptake study:** Mice were fasted overnight,  
458 placed under isoflurane anaesthesia, and given F-18 fluorodeoxyglucose (FDG)  
459 (~0.3mCi/animal) via retro-orbital injection. After 45 minutes, they were sacrificed and  
460 iWAT, iBAT, and gastric-soleus muscle were removed and *ex vivo* radioactivity was  
461 measured by gamma scintillation counting.

462 **Inguinal white adipose tissue stromal vascular fraction (SVF) isolation and**  
463 **culture:** Isolation and culture of iWAT SVF was performed as previously described<sup>42</sup>.  
464 Briefly, iWAT was removed from mice and digested in Collagenase / Dispase buffer  
465 (10mL PBS, 100mg collagenase D, 24mg dispase II, 10mM CaCl<sub>2</sub>, sterile filtered) for 40  
466 minutes at 37°C and 140 rpm. Digested tissue was filtered through 100uM filter and  
467 washed with cold media (DMEM-F12, 10% FBS, 1% penicillin/streptomycin) to  
468 inactivate collagenase. Filtered SVF mixture was centrifuged for 10 minutes at 500 x g  
469 at 4°C and the supernatant was removed and resuspended in media and filtered  
470 through a 70  $\mu$ M sterile filter. The SVF mixture was again centrifuged at 500 x g at 4°C  
471 for 10 minutes. The culture medium was removed and cells were resuspended in fresh

472 medium and plated on collagen coated plates. After 24 hours, plates were washed with  
473 PBS to remove debris. SVF were grown to confluence and induced with adipose  
474 induction cocktail (0.5 mM IBMX, 1  $\mu$ M dexamethasone, 850 nM insulin, and 1  $\mu$ M  
475 rosiglitazone) for 48 hours. After 48 hours, medium was switched to contain only 1  $\mu$ M  
476 rosiglitazone and 850 nM insulin. After another 48 hours, medium was switched once  
477 again to contain only 850 nM insulin. The SVF culture was completely differentiated by  
478 day 7.

479 **Oil red O staining:** Cells were washed with PBS before fixing in 10% phosphate  
480 buffered formalin. Cells were washed twice with double distilled H<sub>2</sub>O before incubating  
481 with 60% isopropanol for 5 minutes. The cells were then dried completely at room  
482 temperature and incubated with Oil Red O for 10 minutes. Oil Red O was then removed  
483 and the cells were washed 4 times with double distilled H<sub>2</sub>O before imaging.

484 **Seahorse:** Seahorse assay was performed as previously described<sup>77</sup>. For tissue  
485 oxygen consumption rate, tissue was removed and cut into ~10-20 mg pieces and  
486 placed in 24-well islet capture plates. Tissue was incubated in 750  $\mu$ L seahorse media  
487 (DMEM + Glutamax, 1 mM pyruvate, 25mM glucose) at 37°C until seahorse assay  
488 performed within 2 hours of mice sacrifice. 75  $\mu$ L of 100  $\mu$ g/ml of oligomycin was  
489 injected for a final concentration of 10  $\mu$ g/ml. The seahorse assay cycles were: mix for 3  
490 minutes, wait for 2 minutes, measure for 3 minutes, repeated 5 times for baseline  
491 measurements before injecting with oligomycin. For muscle and iWAT baseline OCR  
492 measurements, we adopted previously established protocols as reported in<sup>78,79</sup>. Briefly,  
493 muscle and iWAT were collected after sacrifice and washed with Krebs-Henseleit buffer  
494 (KHB) (111 mM NaCl, 4.7 mM KCl, 2 mM MgSO<sub>4</sub>, 1.2 mM Na<sub>2</sub>HPO<sub>4</sub>, 0.5 mM carnitine,



495 2.5 mM glucose and 10 mM sodium pyruvate). Tissue were cut into 5-10 mg pieces and  
496 plated individually on XF24 islet capture plates. Digitonin was added to permeabilize the  
497 membrane. Basal OCR readings were collected with the following cycles: 10 x 2 min  
498 measurements, followed by digitonin injection. Subsequent readings were recorded  
499 after 2 min mixing and 2 min rest. All OCR values were normalized to individual tissue  
500 weights.

501 **Heart rate and arterial blood pressure:** Mixed 129/BL6 mice 2 months old were  
502 treated with DMSO vehicle or PV-02076 (20 mg/kg body weight) for two weeks. On the  
503 day of the experiment, they were anesthetized with isoflurane and mean arterial blood  
504 pressure (MAP) and heart rate were determined over 10 minutes by non-invasive tail  
505 cuff (Coda monitor, Kent Scientific Corp, Torrington, CT).

506  **$\beta$ -guanidinopropionic acid ( $\beta$ -GPA) SVF seahorse experiments:** For  $\beta$ -GPA SVF  
507 seahorse experiments, XF24 cell culture microplates were coated with Rat Tail Collagen  
508 I (Sigma Cat#C3867) before plating wells with prepared SVF as described previously.  
509 On Day 6 of SVF differentiation 50mM of  $\beta$ -GPA or vehicle control were added to the  
510 differentiation cocktail. Seahorse assay was run on Day 7. The seahorse assay cycles  
511 were: mix for 3 minutes, wait for 2 minutes, measure for 3 minutes, repeated 5 times for  
512 baseline measurements. Cells were lysed and protein concentration was measured by  
513 DC protein assay (Bio-Rad). OCR values were normalized to protein levels, and  
514 baseline OCR values were calculated.

515 **RNA expression levels:** Total adipose tissue RNA was extracted by RNeasy Lipid  
516 Tissue Mini Kit (Qiagen), and SVF RNA was extracted with TRIzol (Thermo Fisher)  
517 according to manufacturer instructions. RNA expression levels were measured by qRT-

518 PCR with Power SYBR green RNA-to-Ct 1-step kit (thermo fisher/applied biosystems) in  
519 60 ng RNA/10  $\mu$ L reactions.

520 **Water repulsion:** Water repulsion assay was performed as previously described <sup>19</sup>.

521 Baseline body temperature was measured rectally by probe thermometer (YSI-73ATA).

522 Mice were allowed to swim in 30° C water for 2 minutes before being placed on a paper

523 towel for a few seconds to remove excess water. Mice were placed in clean cage with

524 no bedding at 22°C, and weight and body temperature were determined every 5

525 minutes for 60 minutes.

526 **Thermopreference assay:** Thermopreference assay was performed as previously

527 described <sup>20</sup>. Briefly, three 10-gallon water tanks were used to house mice cages and

528 water heater-circulators were used to maintain water bath temperatures at 22°C, 27°C,

529 and 32°C. Cage temperatures were monitored by thermometer. Cages were connected

530 by translucent tubing to allow freedom of movement across cages. Mouse movement

531 was monitored by a time-lapse, infrared flash overhead camera (Bushnell Model#

532 119740). Mice were subjected to 5 days of 2-hour per day training on the bench top by

533 connecting two cages with the same tubing. Training multiple mice together increased

534 subsequent multi-cage exploration by single mice in the apparatus. For a given

535 thermopreference assay, one trained mouse was placed into the cages with food and

536 water in all three cages. Mouse data were collected for 4 days at 3 minute time lapse

537 intervals, and time spent in each cage was calculated.

538 **Acute cold exposure assay:** Mice housed at 30°C in individual cages without bedding

539 were brought into a 4°C environment in the same cages for up to 3 hours with ample

540 food and water. Core body temperature was measured every 15 minutes by rectal

541 probe. After the experiment, mice were placed under warm a heat lamp to recover body  
542 temperature quickly and were monitored for 1 hour.

543 **Serum Creatine Kinase Activity assay:** To assess muscle activity during cold  
544 exposure, we measured serum creatine kinase activity. 100 µl of blood was collected by  
545 retro-orbital bleeds before and after acute cold exposure. Blood samples were allowed  
546 to coagulate in room temperature for at least 10 minutes before spinning at 5000 x g for  
547 10 minutes. Serum was collected and serum creatine kinase activity was measured  
548 according to manufacturer's instructions (Cat# MAK116, Sigma-Aldrich, St. Louis, MO,  
549 USA)

550 **Gastrointestinal permeability assay:** Mouse intestinal permeability was assessed by  
551 4 kDa FITC-Dextran (FD4; Cat# 46944, Sigma-Aldrich, St. Louis, MO, USA) as  
552 previously reported<sup>80</sup>. Briefly, mice were fasted overnight and FD4 was given by oral  
553 gavage (0.5mg/g BW). After 90 minutes, plasma was collected by retro-orbital bleeding  
554 in EDTA coated tubes (Ref# 365974, Fisher Scientific, Pittsburgh, PA, USA). Plasma  
555 was diluted in equal volume PBS and FD4 was measured by fluorometer with an  
556 excitation wavelength of 485 nm and emission of 535 nm.

557 **Immunohistochemistry:** Immunohistochemistry staining on adipose tissue were  
558 performed by the Albert Einstein College of Medicine Histology and Comparative  
559 Pathology Core. Paraffin fixed slides were heated at 60°C for 1 hour before dewaxing  
560 (xylene 2 x 10min, 100% ethanol 2x2min, 95% ethanol 2x2 min, 80% ethanol 2x2min,  
561 70% ethanol 2 x 2 min, 70% ethanol 2 x 2 min, water). After dewaxing, slides were  
562 washed in TBS buffer twice for 2 minutes each before blocking endogenous peroxidase  
563 activity with 3% hydrogen peroxide for 20 minutes at room temperature. Antigen

564 retrieval using 10 mM pH 6.0 Citrate buffer in steamer was performed for 20 minutes,  
565 then slides were cooled at room temperature for 30 minutes. Slides were washed again  
566 in TBS twice for 3 minutes each before blocking with 2% BSA for 30 minutes at room  
567 temperature. Slides were incubated with primary antibody for 60 minutes at room  
568 temperature (Tyrosine Hydroxylase Cat# AB75875, Abcam Cambridge, MA, USA,  
569 diluted 1:200), then washed 3 times in TBS before applying secondary antibody for 30  
570 minutes at room temperature (Cat# MP-7451, Vector Laboratories, Burlingame, CA,  
571 USA). Slides were washed twice for 5 minutes each before applying DAB for 2 minutes.  
572 Harris Hematoxylin counterstain was applied for 30 seconds, then the slides were  
573 mounted with xylene.

#### 574 **iWAT Mitochondria Extraction and Citrate Synthase activity assay**

575 Mitochondria were extracted from iWAT using the Mitocheck Mitochondrial Isolation Kit  
576 (Cayman Chem Cat# 701010) with a modified protocol. After euthanizing the mice, both  
577 iWAT fat pads, with the central lymph node removed, were placed in ice-cold PBS and  
578 cut into small pieces. The cut fat pad was transferred into 1 ml of the mitochondrial  
579 homogenization buffer and homogenized for 20 seconds in a bead homogenizer  
580 (Benchmark Scientific, Edison, NJ). The homogenized solution was centrifuged at 1000  
581 x g for 3 minutes and the supernatant (below the fat layer) was transferred into a fresh  
582 tube. The lysate was centrifuged again at 1000 x g for 2 minutes and the supernatant  
583 was transferred into another fresh tube to spin at 10,000 x g for 10 minutes. The  
584 supernatant was discarded, and the mitochondria pellet was resuspended and washed  
585 twice in 1 ml of mitochondrial isolation buffer (10,000 x g for 10 minutes). Finally, the  
586 purified mitochondria was resuspended in 50  $\mu$ l of mitochondrial isolation buffer and

587 kept on ice until used for protein quantification and citrate synthase activity assay  
588 according to manufacturer's instructions (Cayman Chem cat#701040).

589

590

591

592

593

594

595 **DATA AVAILABILITY.**

596 Data that support the findings of this study are available from the corresponding authors  
597 on reasonable request.

598

599

600

601

## **ACKNOWLEDGMENTS**

602 We thank Barbara Cannon and Jan Nedergaard for helpful discussions. This work was  
603 supported by NIH grants GM007491 (VJP), DK020541 (VLS), DK10541 and DK020541  
604 (GJS), and AG043517 and AG031782 (RS); by American Diabetes Association grant 1-  
605 18-IBS-062 (RJ); and by the Harrington Discovery Institute (VLS). At Albert Einstein  
606 College of Medicine, we thank the Gruss Magnetic Resonance Research Center, the  
607 Analytical Imaging Facility, the Histotechnology and Comparative Pathology Facility, the  
608 Einstein Norman Fleischer Diabetes Center, and Xue-liang Du of the Seahorse Assay  
609 facility. Creatinine measurements were performed by the University of Alabama - UCSD  
610 O'Brien Kidney Center NIH DK079337.

611

612

## **AUTHOR CONTRIBUTIONS**

613 V.J.P., R.S, G.J.S., and V.L.S. conceptualised the study. V.J.P., R.L., Y.C., and V.L.S.  
614 provided methodology. V.J.P., L.W., M.G.M., and V.L.S. provided format analysis.  
615 V.J.P., R.L., L.W., M.G.M., W.R.K., and Y.C. performed investigations. V.J.P., L.W.,  
616 W.R.K., Y.C., R. S., G.J.S., and V.L.S. provided resources. V.J.P. and V.L.S. wrote the  
617 original draft. V.J.P., R.S., G.J.S., and V.L.S. were involved in review and editing. V.J.P.  
618 and V.L.S. provided study visualization. V.L.S. provided study supervision and  
619 administration. R.S., G.J.S., V.L.S. provided funding acquisition.

620

621

## **COMPETING INTERESTS**

622 All authors declare that they have no conflicts of interest.

623

## REFERENCES

- 624 1 Lipinski, B. A. & Mathias, M. M. Prostaglandin production and lipolysis in isolated  
625 rat adipocytes as affected by dietary fat. *Prostaglandins* **16**, 957-963 (1978).
- 626 2 Michaud, A. *et al.* Prostaglandin (PG) F2 alpha synthesis in human  
627 subcutaneous and omental adipose tissue: modulation by inflammatory cytokines  
628 and role of the human aldose reductase AKR1B1. *PLoS one* **9**, e90861 (2014).
- 629 3 Pisani, D. F. *et al.* The  $\omega$ 6-fatty acid, arachidonic acid, regulates the conversion  
630 of white to brite adipocyte through a prostaglandin/calcium mediated pathway.  
631 *Molecular metabolism* **3**, 834-847 (2014).
- 632 4 Kanai, N. *et al.* Identification and characterization of a prostaglandin transporter.  
633 *Science* **268**, 866-869 (1995).
- 634 5 Schuster, V. L. Molecular mechanisms of prostaglandin transport. *Annu Rev*  
635 *Physiol* **60**, 221-242 (1998).
- 636 6 Nomura, T., Lu, R., Pucci, M. L. & Schuster, V. L. The two-step model of  
637 prostaglandin signal termination: in vitro reconstitution with the prostaglandin  
638 transporter and prostaglandin 15 dehydrogenase. *Mol Pharmacol* **65**, 973-978  
639 (2004).
- 640 7 Chi, Y., Suadicani, S. O. & Schuster, V. L. Regulation of prostaglandin EP1 and  
641 EP4 receptor signaling by carrier-mediated ligand reuptake. *Pharmacology*  
642 *research & perspectives* **2**, e00051, doi:10.1002/prp2.51 (2014).
- 643 8 Reginato, M. J., Krakow, S. L., Bailey, S. T. & Lazar, M. A. Prostaglandins  
644 promote and block adipogenesis through opposing effects on peroxisome  
645 proliferator-activated receptor gamma. *J Biol Chem* **273**, 1855-1858 (1998).
- 646 9 Taketani, Y. *et al.* Activation of the prostanoid FP receptor inhibits adipogenesis  
647 leading to deepening of the upper eyelid sulcus in prostaglandin-associated  
648 periorbitopathy. *Investigative ophthalmology & visual science* **55**, 1269-1276,  
649 doi:10.1167/iovs.13-12589 (2014).
- 650 10 Volat, F. E. *et al.* Depressed levels of prostaglandin F2alpha in mice lacking  
651 *Akr1b7* increase basal adiposity and predispose to diet-induced obesity.  
652 *Diabetes* **61**, 2796-2806, doi:10.2337/db11-1297 (2012).

- 653 11 Vegiopoulos, A. *et al.* Cyclooxygenase-2 controls energy homeostasis in mice by  
654 de novo recruitment of brown adipocytes. *Science* **328**, 1158-1161,  
655 doi:10.1126/science.1186034 (2010).
- 656 12 Madsen, L. *et al.* UCP1 induction during recruitment of brown adipocytes in white  
657 adipose tissue is dependent on cyclooxygenase activity. *PLoS One* **5**, e11391,  
658 doi:10.1371/journal.pone.0011391 (2010).
- 659 13 García-Alonso, V. *et al.* Prostaglandin E 2 Exerts Multiple Regulatory Actions on  
660 Human Obese Adipose Tissue Remodeling, Inflammation, Adaptive  
661 Thermogenesis and Lipolysis. *PloS one* **11**, e0153751 (2016).
- 662 14 Garcia-Alonso, V. *et al.* Coordinate functional regulation between microsomal  
663 prostaglandin E synthase-1 (mPGES-1) and peroxisome proliferator-activated  
664 receptor gamma (PPARgamma) in the conversion of white-to-brown adipocytes.  
665 *J Biol Chem* **288**, 28230-28242, doi:10.1074/jbc.M113.468603 (2013).
- 666 15 Kondepudi, D. *Introduction to modern thermodynamics*. (Wiley, 2008).
- 667 16 Halford, J. C., Wanninayake, S. C. & Blundell, J. E. Behavioral satiety sequence  
668 (BSS) for the diagnosis of drug action on food intake. *Pharmacology*  
669 *Biochemistry and Behavior* **61**, 159-168 (1998).
- 670 17 Virtue, S., Even, P. & Vidal-Puig, A. Below thermoneutrality, changes in activity  
671 do not drive changes in total daily energy expenditure between groups of mice.  
672 *Cell metabolism* **16**, 665-671 (2012).
- 673 18 Nedergaard, J. & Cannon, B. The browning of white adipose tissue: some  
674 burning issues. *Cell Metab* **20**, 396-407, doi:10.1016/j.cmet.2014.07.005 (2014).
- 675 19 Westerberg, R. *et al.* Role for ELOVL3 and fatty acid chain length in development  
676 of hair and skin function. *Journal of Biological Chemistry* **279**, 5621-5629 (2004).
- 677 20 Gaskill, B. N., Rohr, S. A., Pajor, E. A., Lucas, J. R. & Garner, J. P. Working with  
678 what you've got: Changes in thermal preference and behavior in mice with or  
679 without nesting material. *Journal of Thermal Biology* **36**, 193-199 (2011).
- 680 21 Abreu-Vieira, G., Xiao, C., Gavrilova, O. & Reitman, M. L. Integration of body  
681 temperature into the analysis of energy expenditure in the mouse. *Molecular*  
682 *metabolism* **4**, 461-470 (2015).



- 683 22 Scholander, P., Hock, R., Walters, V. & Irving, L. Adaptation to cold in arctic and  
684 tropical mammals and birds in relation to body temperature, insulation, and basal  
685 metabolic rate. *The Biological Bulletin* **99**, 259-271 (1950).
- 686 23 Fischer, A. W., Csikasz, R. I., von Essen, G., Cannon, B. & Nedergaard, J. No  
687 insulating effect of obesity. *American Journal of Physiology-Endocrinology and*  
688 *Metabolism* **311**, E202-E213 (2016).
- 689 24 Kazak, L. *et al.* A Creatine-Driven Substrate Cycle Enhances Energy Expenditure  
690 and Thermogenesis in Beige Fat. *Cell* **163**, 643-655 (2015).
- 691 25 Feldmann, H. M., Golozoubova, V., Cannon, B. & Nedergaard, J. UCP1 ablation  
692 induces obesity and abolishes diet-induced thermogenesis in mice exempt from  
693 thermal stress by living at thermoneutrality. *Cell metabolism* **9**, 203-209 (2009).
- 694 26 Chouchani, E. T., Kazak, L. & Spiegelman, B. M. New Advances in Adaptive  
695 Thermogenesis: UCP1 and Beyond. *Cell Metabolism* **29**, 27-37 (2018).
- 696 27 Schuster, V. L. & Chi, Y. (Google Patents, 2017).
- 697 28 Chi, Y. *et al.* Development of a high-affinity inhibitor of the prostaglandin  
698 transporter. *J Pharmacol Exp Ther* **339**, 633-641, doi:10.1124/jpet.111.181354  
699 (2011).
- 700 29 Golozoubova, V. *et al.* Only UCP1 can mediate adaptive nonshivering  
701 thermogenesis in the cold. *The FASEB Journal* **15**, 2048-2050 (2001).
- 702 30 Enerback, S. *et al.* Mice lacking mitochondrial uncoupling protein are cold-  
703 sensitive but not obese. *Nature* **387**, 90-93 (1997).
- 704 31 Molderings, G. J., Likungu, J. & Göthert, M. Modulation of noradrenaline release  
705 from the sympathetic nerves of human right atrial appendages by presynaptic  
706 EP3-and DP-receptors. *Naunyn-Schmiedeberg's archives of pharmacology* **358**,  
707 440-444 (1998).
- 708 32 Exner, H. J. & Schlicker, E. Prostanoid receptors of the EP3 subtype mediate the  
709 inhibitory effect of prostaglandin E2 on noradrenaline release in the mouse brain  
710 cortex. *Naunyn-Schmiedeberg's archives of pharmacology* **351**, 46-52 (1995).
- 711 33 Molderings, G., Malinowska, B. & Schlicker, E. Inhibition of noradrenaline release  
712 in the rat vena cava via prostanoid receptors of the EP3 - subtype. *British journal*  
713 *of pharmacology* **107**, 352-355 (1992).

- 714 34 Baines, A. D. Effects of salt intake and renal denervation on catecholamine  
715 catabolism and excretion. *Kidney international* **21**, 316-322 (1982).
- 716 35 Lepschy, M., Rettenbacher, S., Touma, C. & Palme, R. Excretion of  
717 catecholamines in rats, mice and chicken. *Journal of Comparative Physiology B*  
718 **178**, 629-636 (2008).
- 719 36 Esler, M. *et al.* Overflow of catecholamine neurotransmitters to the circulation:  
720 source, fate, and functions. *Physiol Rev* **70**, 963-985 (1990).
- 721 37 Chi, Y. *et al.* Inhibition of the Prostaglandin Transporter PGT Lowers Blood  
722 Pressure in Hypertensive Rats and Mice. *PloS one* **10**, e0131735 (2015).
- 723 38 Gehrman, J. *et al.* Phenotypic screening for heart rate variability in the mouse.  
724 *American Journal of Physiology-Heart and Circulatory Physiology* **279**, H733-  
725 H740 (2000).
- 726 39 Ishii, K., Kuwahara, M., Tsubone, H. & Sugano, S. Autonomic nervous function in  
727 mice and voles (*Microtus arvalis*): investigation by power spectral analysis of  
728 heart rate variability. *Laboratory animals* **30**, 359-364 (1996).
- 729 40 Contreras, G. A., Lee, Y.-H., Mottillo, E. P. & Granneman, J. G. Inducible brown  
730 adipocytes in subcutaneous inguinal white fat: the role of continuous sympathetic  
731 stimulation. *American Journal of Physiology-Endocrinology and Metabolism* **307**,  
732 E793-E799 (2014).
- 733 41 Scott, M. A., Nguyen, V. T., Levi, B. & James, A. W. Current methods of  
734 adipogenic differentiation of mesenchymal stem cells. *Stem cells and*  
735 *development* **20**, 1793-1804 (2011).
- 736 42 Rodbell, M. Metabolism of isolated fat cells I. Effects of hormones on glucose  
737 metabolism and lipolysis. *J Biol Chem* **239**, 375-380 (1964).
- 738 43 Sears, I. B., MacGinnitie, M. A., Kovacs, L. G. & Graves, R. A. Differentiation-  
739 dependent expression of the brown adipocyte uncoupling protein gene:  
740 regulation by peroxisome proliferator-activated receptor gamma. *Molecular and*  
741 *cellular biology* **16**, 3410-3419 (1996).
- 742 44 Jones, J. R. *et al.* Deletion of PPAR $\gamma$  in adipose tissues of mice protects against  
743 high fat diet-induced obesity and insulin resistance. *Proceedings of the National*  
744 *Academy of Sciences* **102**, 6207-6212 (2005).

- 745 45 Xu, L. *et al.* Ablation of PPAR  $\gamma$  in subcutaneous fat exacerbates age -  
746 associated obesity and metabolic decline. *Aging cell* **17**, e12721 (2018).
- 747 46 Klepac, K. *et al.* The Gq signalling pathway inhibits brown and beige adipose  
748 tissue. *Nature communications* **7**, 1-10 (2016).
- 749 47 Griffin, B. W., Klimko, P., Crider, J. Y. & Sharif, N. A. AL-8810: a novel  
750 prostaglandin F2 alpha analog with selective antagonist effects at the  
751 prostaglandin F2 alpha (FP) receptor. *J Pharmacol Exp Ther* **290**, 1278-1284  
752 (1999).
- 753 48 Glushakov, A. V., Robbins, S. W., Bracy, C. L., Narumiya, S. & Doré, S.  
754 Prostaglandin F 2 $\alpha$  FP receptor antagonist improves outcomes after  
755 experimental traumatic brain injury. *Journal of neuroinflammation* **10**, 132 (2013).
- 756 49 Kim, Y. T., Moon, S. K., Maruyama, T., Narumiya, S. & Doré, S. Prostaglandin  
757 FP receptor inhibitor reduces ischemic brain damage and neurotoxicity.  
758 *Neurobiology of disease* **48**, 58-65 (2012).
- 759 50 Ukropec, J., Anunciado, R. P., Ravussin, Y., Hulver, M. W. & Kozak, L. P. UCP1-  
760 independent thermogenesis in white adipose tissue of cold-acclimated Ucp1-/-  
761 mice. *Journal of Biological Chemistry* **281**, 31894-31908 (2006).
- 762 51 Serrero, G., Lepak, N. M. & Goodrich, S. P. Prostaglandin F2 $\alpha$  inhibits the  
763 differentiation of adipocyte precursors in primary culture. *Biochemical and*  
764 *biophysical research communications* **183**, 438-442 (1992).
- 765 52 Lepak, N. & Serrero, G. Inhibition of adipose differentiation by 9 $\alpha$ , 11 $\beta$ -  
766 prostaglandin F2 $\alpha$ . *Prostaglandins* **46**, 511-517 (1993).
- 767 53 Casimir, D. A., Miller, C. W. & Ntambi, J. M. Preadipocyte differentiation blocked  
768 by prostaglandin stimulation of prostanoid FP2 receptor in murine 3T3-L1 cells.  
769 *Differentiation; research in biological diversity* **60**, 203-210, doi:10.1046/j.1432-  
770 0436.1996.6040203.x (1996).
- 771 54 Liu, L. & Clipstone, N. A. Prostaglandin F2  $\alpha$  inhibits adipocyte differentiation via  
772 a G  $\alpha$  q - Calcium - Calcineurin - Dependent signaling pathway. *Journal of*  
773 *cellular biochemistry* **100**, 161-173 (2007).
- 774 55 Annamalai, D. & Clipstone, N. A. Prostaglandin F2  $\alpha$  inhibits adipogenesis via an  
775 autocrine - mediated interleukin - 11/glycoprotein 130/STAT1 - dependent  
776 signaling cascade. *Journal of cellular biochemistry* **115**, 1308-1321 (2014).

- 777 56 Shabalina, I. G. *et al.* UCP1 in brite/beige adipose tissue mitochondria is  
778 functionally thermogenic. *Cell reports* **5**, 1196-1203 (2013).
- 779 57 Stawski, C., Koteja, P. & Sadowska, E. T. A Shift in the Thermoregulatory Curve  
780 as a Result of Selection for High Activity-Related Aerobic Metabolism. *Front*  
781 *Physiol* **8**, 1070, doi:10.3389/fphys.2017.01070 (2017).
- 782 58 Stawski, C., Koteja, P., Sadowska, E. T., Jefimow, M. & Wojciechowski, M. S.  
783 Selection for high activity-related aerobic metabolism does not alter the capacity  
784 of non-shivering thermogenesis in bank voles. *Comparative Biochemistry and*  
785 *Physiology Part A: Molecular & Integrative Physiology* **180**, 51-56 (2015).
- 786 59 Golozoubova, V., Cannon, B. & Nedergaard, J. UCP1 is essential for adaptive  
787 adrenergic nonshivering thermogenesis. *American Journal of Physiology-*  
788 *Endocrinology and Metabolism* **291**, E350-E357 (2006).
- 789 60 Hofmann, W. E., Liu, X., Bearden, C. M., Harper, M.-E. & Kozak, L. P. Effects of  
790 genetic background on thermoregulation and fatty acid-induced uncoupling of  
791 mitochondria in UCP1-deficient mice. *Journal of Biological Chemistry* **276**,  
792 12460-12465 (2001).
- 793 61 Pollard, A. E. *et al.* AMPK activation protects against diet induced obesity  
794 through Ucp1-independent thermogenesis in subcutaneous white adipose tissue.  
795 *Nat Metab* **1**, 340-349, doi:10.1038/s42255-019-0036-9 (2019).
- 796 62 Danneskiold-Samsøe, N. B. *et al.* Overexpression of cyclooxygenase-2 in  
797 adipocytes reduces fat accumulation in inguinal white adipose tissue and hepatic  
798 steatosis in high-fat fed mice. *Scientific Reports* **9**, 8979 (2019).
- 799 63 Burl, R. B. *et al.* Deconstructing adipogenesis induced by  $\beta$ 3-adrenergic receptor  
800 activation with single-cell expression profiling. *Cell metabolism* **28**, 300-309  
801 (2018).
- 802 64 Kazak, L. *et al.* Genetic Depletion of Adipocyte Creatine Metabolism Inhibits Diet-  
803 Induced Thermogenesis and Drives Obesity. *Cell Metab* **26**, 660-671,  
804 doi:10.1016/j.cmet.2017.08.009 (2017).
- 805 65 Kazak, L. *et al.* Ablation of adipocyte creatine transport impairs thermogenesis  
806 and causes diet-induced obesity. *Nature Metabolism* **1**, 360-370 (2019).
- 807 66 Cheng, Y. *et al.* Prediction of Adipose Browning Capacity by Systematic  
808 Integration of Transcriptional Profiles. *Cell reports* **23**, 3112-3125 (2018).

- 809 67 Shan, T. *et al.* Distinct populations of adipogenic and myogenic Myf5-lineage  
810 progenitors in white adipose tissues. *Journal of lipid research* **54**, 2214-2224  
811 (2013).
- 812 68 Sanchez-Gurmaches, J. *et al.* PTEN loss in the Myf5 lineage redistributes body  
813 fat and reveals subsets of white adipocytes that arise from Myf5 precursors. *Cell*  
814 *metabolism* **16**, 348-362 (2012).
- 815 69 Ikeda, K. *et al.* UCP1-independent signaling involving SERCA2b-mediated  
816 calcium cycling regulates beige fat thermogenesis and systemic glucose  
817 homeostasis. *Nat Med* **23**, 1454-1465, doi:10.1038/nm.4429 (2017).
- 818 70 Bertholet, A. M. *et al.* Mitochondrial patch clamp of beige adipocytes reveals  
819 UCP1-positive and UCP1-negative cells both exhibiting futile creatine cycling.  
820 *Cell metabolism* **25**, 811-822 (2017).
- 821 71 Chouchani, E. T. & Kajimura, S. Metabolic adaptation and maladaptation in  
822 adipose tissue. *Nature Metabolism* **1**, 189-200, doi:10.1038/s42255-018-0021-8  
823 (2019).
- 824 72 Mottillo, E. P. *et al.* Coupling of lipolysis and de novo lipogenesis in brown, beige,  
825 and white adipose tissues during chronic  $\beta$ 3-adrenergic receptor activation.  
826 *Journal of lipid research* **55**, 2276-2286 (2014).
- 827 73 Marlatt, K. L., Chen, K. Y. & Ravussin, E. Is Activation of Human Brown Adipose  
828 Tissue a Viable Target for Weight Management? *American journal of physiology.*  
829 *Regulatory, integrative and comparative physiology* **315**, R479-R483 (2018).
- 830 74 Anunciado-Koza, R., Ukropec, J., Koza, R. A. & Kozak, L. P. Inactivation of  
831 UCP1 and the glycerol phosphate cycle synergistically increases energy  
832 expenditure to resist diet-induced obesity. *Journal of Biological Chemistry* **283**,  
833 27688-27697 (2008).
- 834 75 Riachi, M., Himms-Hagen, J. & Harper, M.-E. Percent relative cumulative  
835 frequency analysis in indirect calorimetry: application to studies of transgenic  
836 mice. *Canadian journal of physiology and pharmacology* **82**, 1075-1083 (2004).
- 837 76 Chang, H. Y., Locker, J., Lu, R. & Schuster, V. L. Failure of postnatal ductus  
838 arteriosus closure in prostaglandin transporter-deficient mice. *Circulation* **121**,  
839 529-536, doi:CIRCULATIONAHA.109.862946 [pii]  
840 10.1161/CIRCULATIONAHA.109.862946 (2010).

- 841 77 Bugge, A., Dib, L. & Collins, S. in *Methods Enzymol* Vol. 538 233-247  
842 (Elsevier, 2014).
- 843 78 Martinez-Lopez, N. *et al.* Autophagy in the CNS and Periphery Coordinate  
844 Lipophagy and Lipolysis in the Brown Adipose Tissue and Liver. *Cell metabolism*  
845 **23**, 113-127 (2016).
- 846 79 Martinez-Lopez, N. *et al.* System-wide Benefits of Intermeal Fasting by  
847 Autophagy. *Cell Metab* **26**, 856-871.e855, doi:10.1016/j.cmet.2017.09.020  
848 (2017).
- 849 80 Dong, C. X. *et al.* The intestinal epithelial insulin-like growth factor-1 receptor  
850 links glucagon-like peptide-2 action to gut barrier function. *Endocrinology* **155**,  
851 370-379 (2014).  
852

853

## FIGURE TITLES AND LEGENDS

### 854 **Figure 1. PGT-KO mice exhibit a lean phenotype**

855 **(A)** Increased urinary concentrations of PGE<sub>2</sub> and PGF<sub>2α</sub> in PGT-KO mice, n=4 per  
856 group. **(B-D)** Representative gene-dosing effect on waist circumference of WT, PGT  
857 heterozygote, and PGT-KO mice. **(E-F)** Representative CT images of PGT WT and KO  
858 mice. Arrows indicate subcutaneous white adipose tissue (iWAT). **(G-I)** Representative  
859 visceral adipose tissue in WT, PGT heterozygote, and PGT-KO mice. **(J-L)** H&E  
860 sections of dermal adipose tissue in WT, PGT heterozygote, and PGT-KO mice. Bar =  
861 50 μm. **(M-N)** Representative H&E sections of liver in WT and PGT-KO mice. Bar = 10  
862 μm. **(O)** Quantification of total body lean and fat mass by echoMRI, n=4 per group. **(P)**  
863 Glucose tolerance test of WT and PGT-KO mice. N=4 per group. All mice housed at  
864 ambient temperature and fed a 9% fat diet by weight. Values are mean ± SEM.  
865 (\*P<0.05, \*\*P<0.01, \*\*\*P<0.001, versus respective control; Student's t-test). For B-D, E-  
866 F, G-I, J-L, and M-N example shown were littermates.

867

### 868 **Figure 2. PGT-KO mice display increased energy expenditure with beige** 869 **induction in the iWAT depot.**

870 **(A)** Increased food intake in PGT-KO mice, n=4 per group. **(B)** WT and PGT-KO mouse  
871 activity over 24 hours as measured by infrared beam break. Arrows indicate time points  
872 at which mean activity in PGT-KO mice is significantly greater (p<0.05) than that of WT  
873 mice. **(C)** Increase in VO<sub>2</sub> per lean body mass in PGT-KO mice as measured by indirect  
874 calorimetry, n=4 per group. **(D)** 18-fluorodeoxyglucose uptake by gastroc-soleus  
875 skeletal muscle, interscapular brown adipose tissue (iBAT), and iWAT, n=4 per group.

876 Data represent total uptake for the entire designated tissue of the mouse. **(E)** Increased  
877 citrate synthase activity in isolated PGT-KO iWAT mitochondria, n=4 per group, as  
878 activity per mg protein and extrapolated to whole mouse iWAT using depot weights. **(F)**  
879 Gene expression analysis of browning gene markers Cidea, Dio2, PGC1 $\alpha$ , and UCP1 in  
880 iWAT of WT and PGT-KO mice by qRT-PCR, n=8 per group. **(G)** Increased oxygen  
881 consumption rate (OCR) in iWAT, measured by Seahorse assay, expressed as OCR  
882 per minute per mg tissue, extrapolated to entire iWAT fat pad by weight, and  
883 extrapolated to the entire mouse based on the weight of both iWAT fat pads. Cell  
884 membranes were permeabilized to substrates with digitonin as indicated, n=10. All mice  
885 housed at ambient temperature and fed a 9% fat diet by weight. Values are mean  $\pm$   
886 SEM. (\*P<0.05, \*\*P<0.01, versus respective control; Student's t-test)

887

888 ***Figure 3. Primary thermogenesis in PGT-KO mice.***

889 **(A)** Thermopreference assay of WT and PGT-KO mice over the 24 hour diurnal cycle  
890 (left panel), and displayed separately in the inactive and active phases (middle and right  
891 panels), n=6. **(B)** Shifting of thermopreference in WT and PGT-KO mice after  
892 acclimation to either ambient temperature or to thermoneutrality, n=4 per group. **(C)**  
893 Increased heat generation in PGT-KO mice as measured by indirect calorimetry, n=4  
894 per group. **(D)** Increased core body temperature in PGT-KO mice at 30°C, as measured  
895 by intraperitoneal probe, n=4 per group. **(E)** Normal core body temperature in PGT-KO  
896 mice at 22°C, as measured by intraperitoneal probe, n=4 per group. **(F)** Decreased  
897 activity of PGT-KO mice housed at 30°C, as measured by infrared beam break, n=4 per  
898 group. **(G)** Scholander plot analysis of WT and PGT-KO mice, n=8 per group. For (A),



899 mice were housed at ambient temperature. For (B), the housing acclimation  
900 temperature prior to the acute thermopreference assay is shown in the inset. For (C-G),  
901 mice were housed at 30°C for  $\geq 1$  month before the respective assay. In all cases, mice  
902 were eating 9% fat diet by weight. Values are mean  $\pm$  SEM. (\*P<0.05, \*\*P<0.01 versus  
903 respective control; Student's t-test with Bonferroni correction where applicable.).

904

905 **Figure 4. PGT deletion or pharmacological inhibition induces UCP1-independent**  
906 **thermogenesis.**

907 **(A-B)** iWAT UCP1 gene expression in PGT-KO mice housed at thermoneutrality (A) and  
908 after 16 hours' exposure to 4°C (B). **(C)** Decrease in core body temperature upon 2  
909 hours' acute exposure to 4°C in UCP1-KO mice given vehicle for 1 week (left); the same  
910 mice after receiving PGT inhibitor PV-02076 for 1 week (centre); and the same mice  
911 after inhibitor washout (vehicle) for 2 weeks (right). n=6. **(D)** UCP1-KO mice exhibit  
912 Increase in VO<sub>2</sub> when given PGT inhibitor PV-02076 (left) compared to DMSO control.  
913 VO<sub>2</sub> data as percent relative cumulative frequency (PRCF) analysis<sup>75</sup> (right), presented  
914 as mean  $\pm$  SEM, n=4 per group. At a PRCF of 50%, the DMSO mean VO<sub>2</sub> = 2636 $\pm$  35  
915 and the PV mean VO<sub>2</sub> = 3030 $\pm$ 78, p = 0.015 by Student's t-test. **(E)** Induction of  
916 browning gene expression markers in UCP1-KO mice given vehicle or PV-02076, n=4  
917 per group. All mice were housed at thermoneutrality except for cold exposure in (C).  
918 Values are mean  $\pm$  SEM. (\*P<0.05, \*\*P<0.01, versus respective control; Student's t-test  
919 (A-B, D-E) and one way ANOVA (C).

920

921 **Figure 5. Mechanisms of suppression of UCP1 in PGT-KO mice.**

922 **(A)** Inhibition of systemic norepinephrine release in PGT-KO mice housed at 30°C (n=4  
923 per group) and in C57BL/6J mice given PV-02076 for 1 month at 22°C (n=8 per group),  
924 as measured by urinary norepinephrine levels. **(B)** Decreased protein kinase A activity  
925 in iWAT of PGT-KO mice. **(C)** Decreased expression of adipocyte markers in adipocytes  
926 derived from stromal vascular fraction (SVF) of WT and PGT-KO iWAT as measured by  
927 qRT-PCR **(D)** Decreased lipid droplet accumulation in SVF-derived adipocytes as  
928 measured by oil red O staining. **(E)** Decreased PPAR $\gamma$ 2 expression in adipocytes  
929 induced *in vitro* from SVFs derived from iWAT of WT and PGT-KO mice housed at 22°C  
930 eating 9% fat diet, and from comparable mice housed at 30°C and eating a 60% high fat  
931 diet. For figures (C-D), values are mean  $\pm$  SEM of at least 3 independent experiments.  
932 **(G)** Rescue of PPAR $\gamma$ 2, UCP1, and aP2 gene expression in iWAT of PGT-KO mice  
933 given FP antagonist AL-8810, as measured by qRT-PCR, n=4 per group. Values are  
934 mean  $\pm$  SEM. (\*P<0.05, \*\*P<0.01, \*\*\*P<0.001, versus respective control; Student's t-  
935 test)

936

937 **Figure 6. Increased ATP-coupled thermogenesis and creatine shuttle gene**  
938 **expression in PGT-KO mice.**

939 **(A-B)** Increased ATP synthase activity in iWAT of PGT-KO mice (n=8). ATP synthase  
940 activity is calculated as (average baseline OCR) – (average oligomycin OCR). **(C-F)**  
941 Creatine shuttle gene expression in iWAT: Ckmt = mitochondrial creatine kinase, Slc6a8  
942 = Na<sup>+</sup>-creatine symporter. (C) iWAT of WT vs PGT-KO; (D) iWAT of C57BL6 mice  
943 administered vehicle (DMSO) or the PGT inhibitor PV-01076; (E) UCP1-KO mice  
944 administered DMSO or PV-02076 **(F)** Loss of induction of PGT-KO iWAT creatine

945 shuttle genes after blockade of the  $\text{PGF}_{2\alpha}$  receptor FP by AL8810. Values are mean  $\pm$   
946 SEM, (\* $P < 0.05$ , \*\* $P < 0.01$ , \*\*\* $P < 0.001$ , versus respective control; Student's t-test). All  
947 mice housed at thermoneutrality and consuming 9% fat by weight diet.

948

949 **Figure 7. Non-canonical thermogenesis supported by the creatine shuttle in iWAT**  
950 **adipocytes *in vitro*.**

951 **(A)** Oxygen consumption rate (OCR) of SVF-derived adipocytes. **(B)** Oligomycin-  
952 sensitive OCR from A, equivalent to ATP synthase activity. **(C)** Up-regulation of Ckmt2  
953 in PGT-KO adipocytes *in vitro*. **(D)** Inhibition of OCR by  $\beta$ -GPA in adipocytes *in vitro*  
954 derived from UCP1-KO iWAT. **(E)** Reversal *in vitro* by  $\beta$ -GPA of elevated OCR in  
955 adipocytes derived from PGT-KO iWAT. OCRs calculated as averages from 5 wells  
956 across 4 independent time points.  $n = 4$ . For (D) \*\*  $p < 0.01$  by Student's t-test; for (E) \*\*  
957  $p < 0.01$  by one-way ANOVA.

958

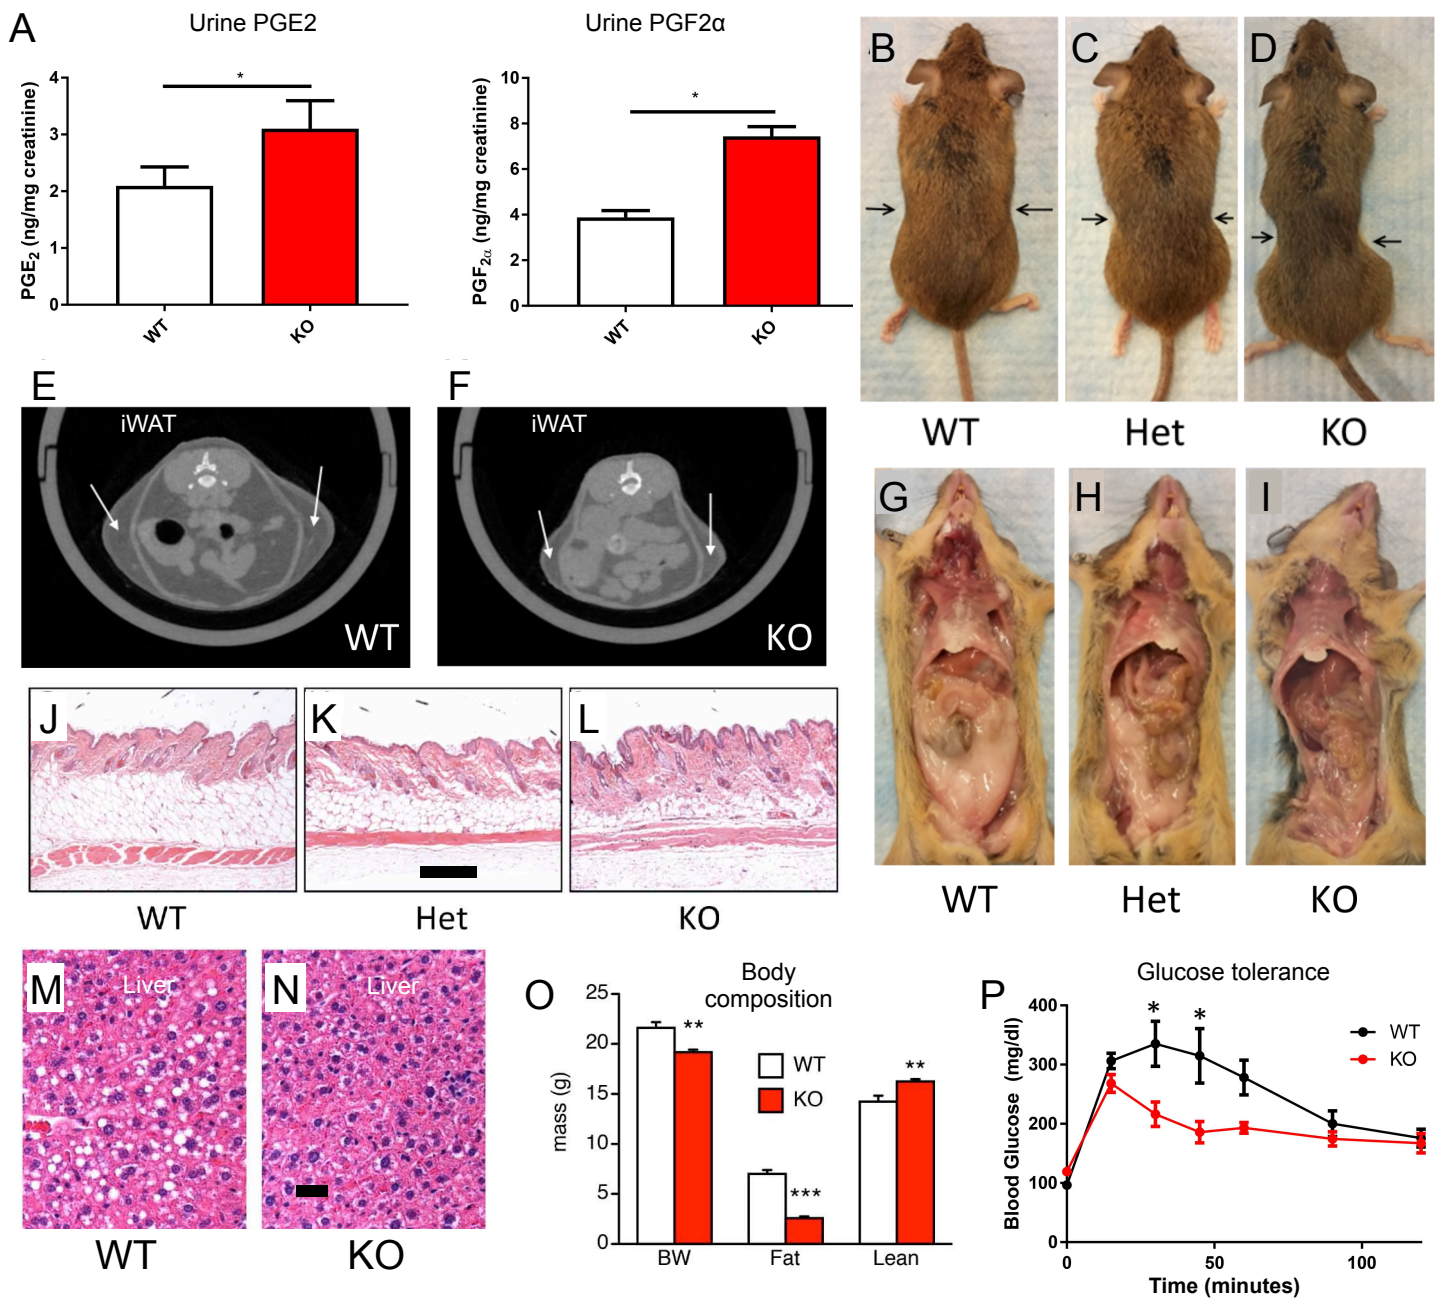

Pai et al Figure 1

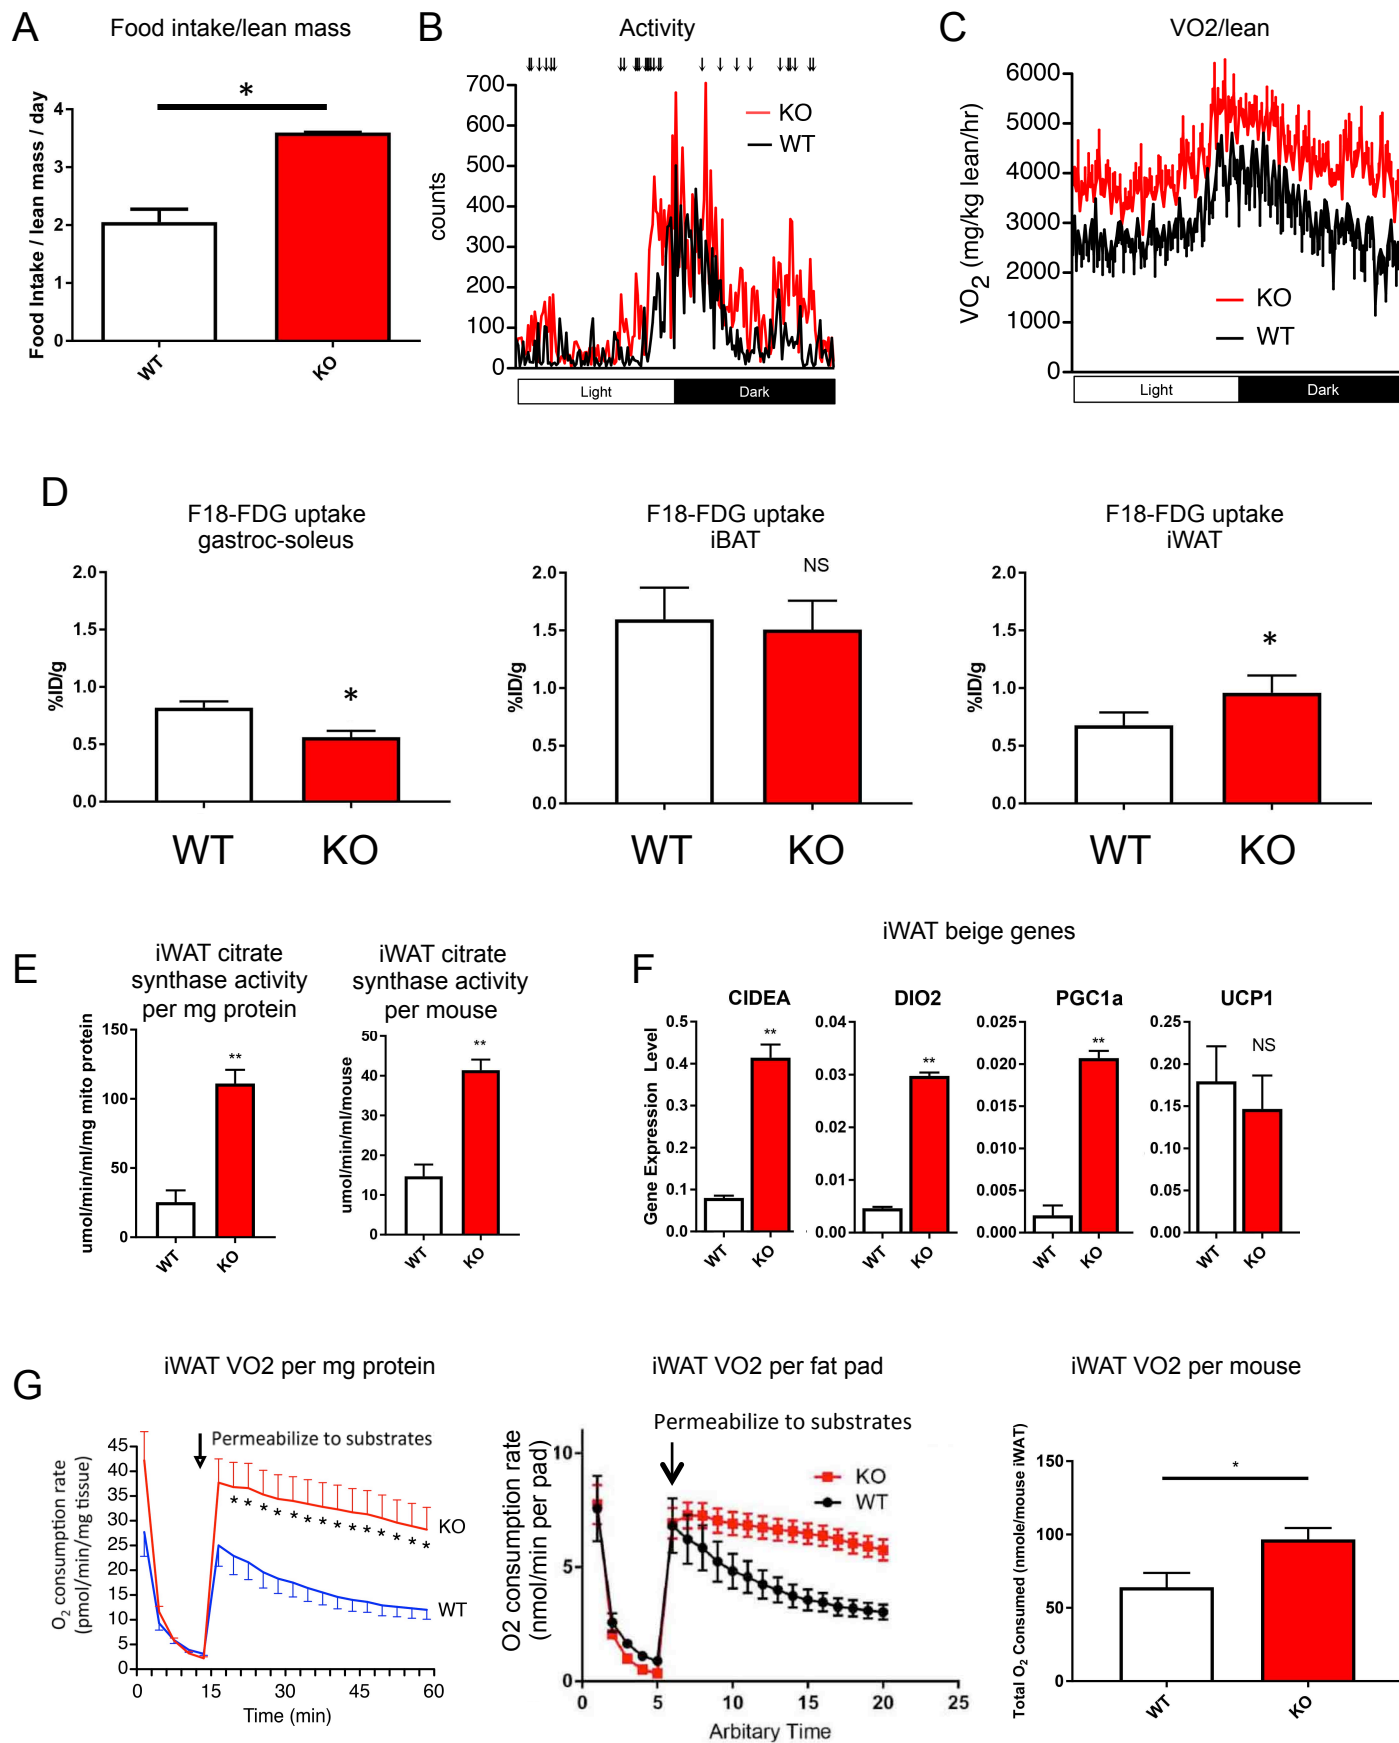

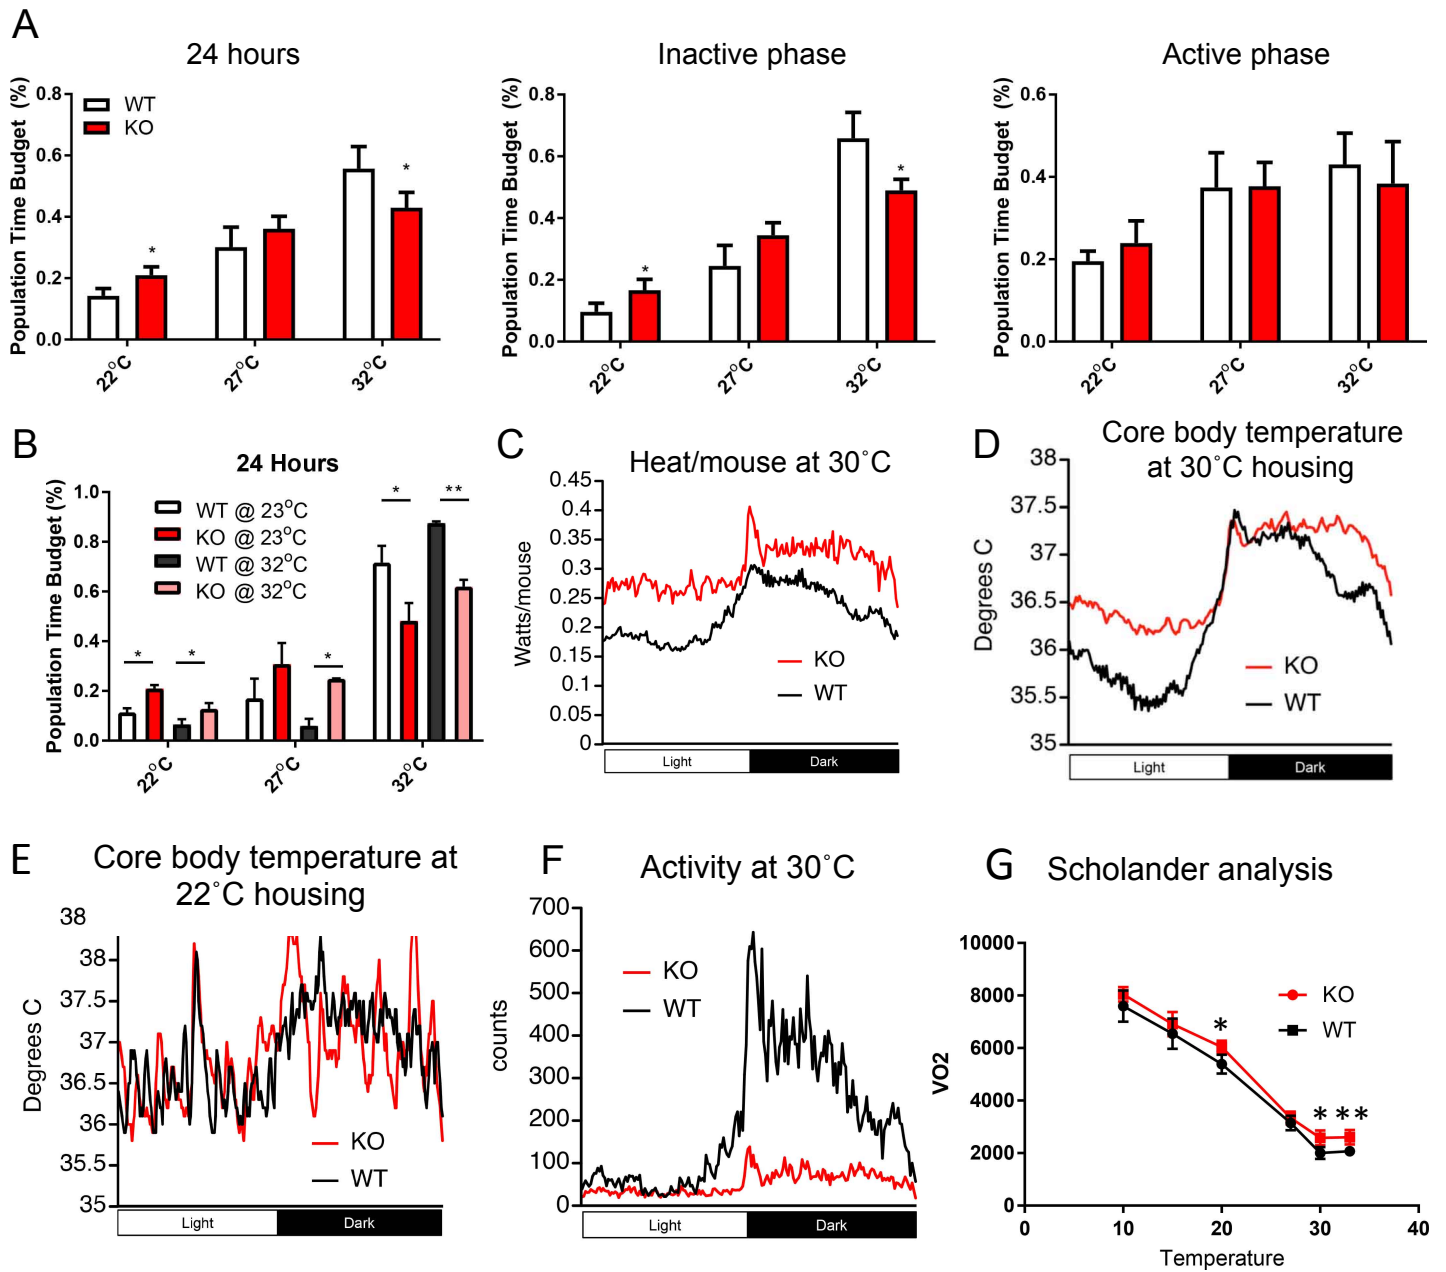

Pai et al Figure 3

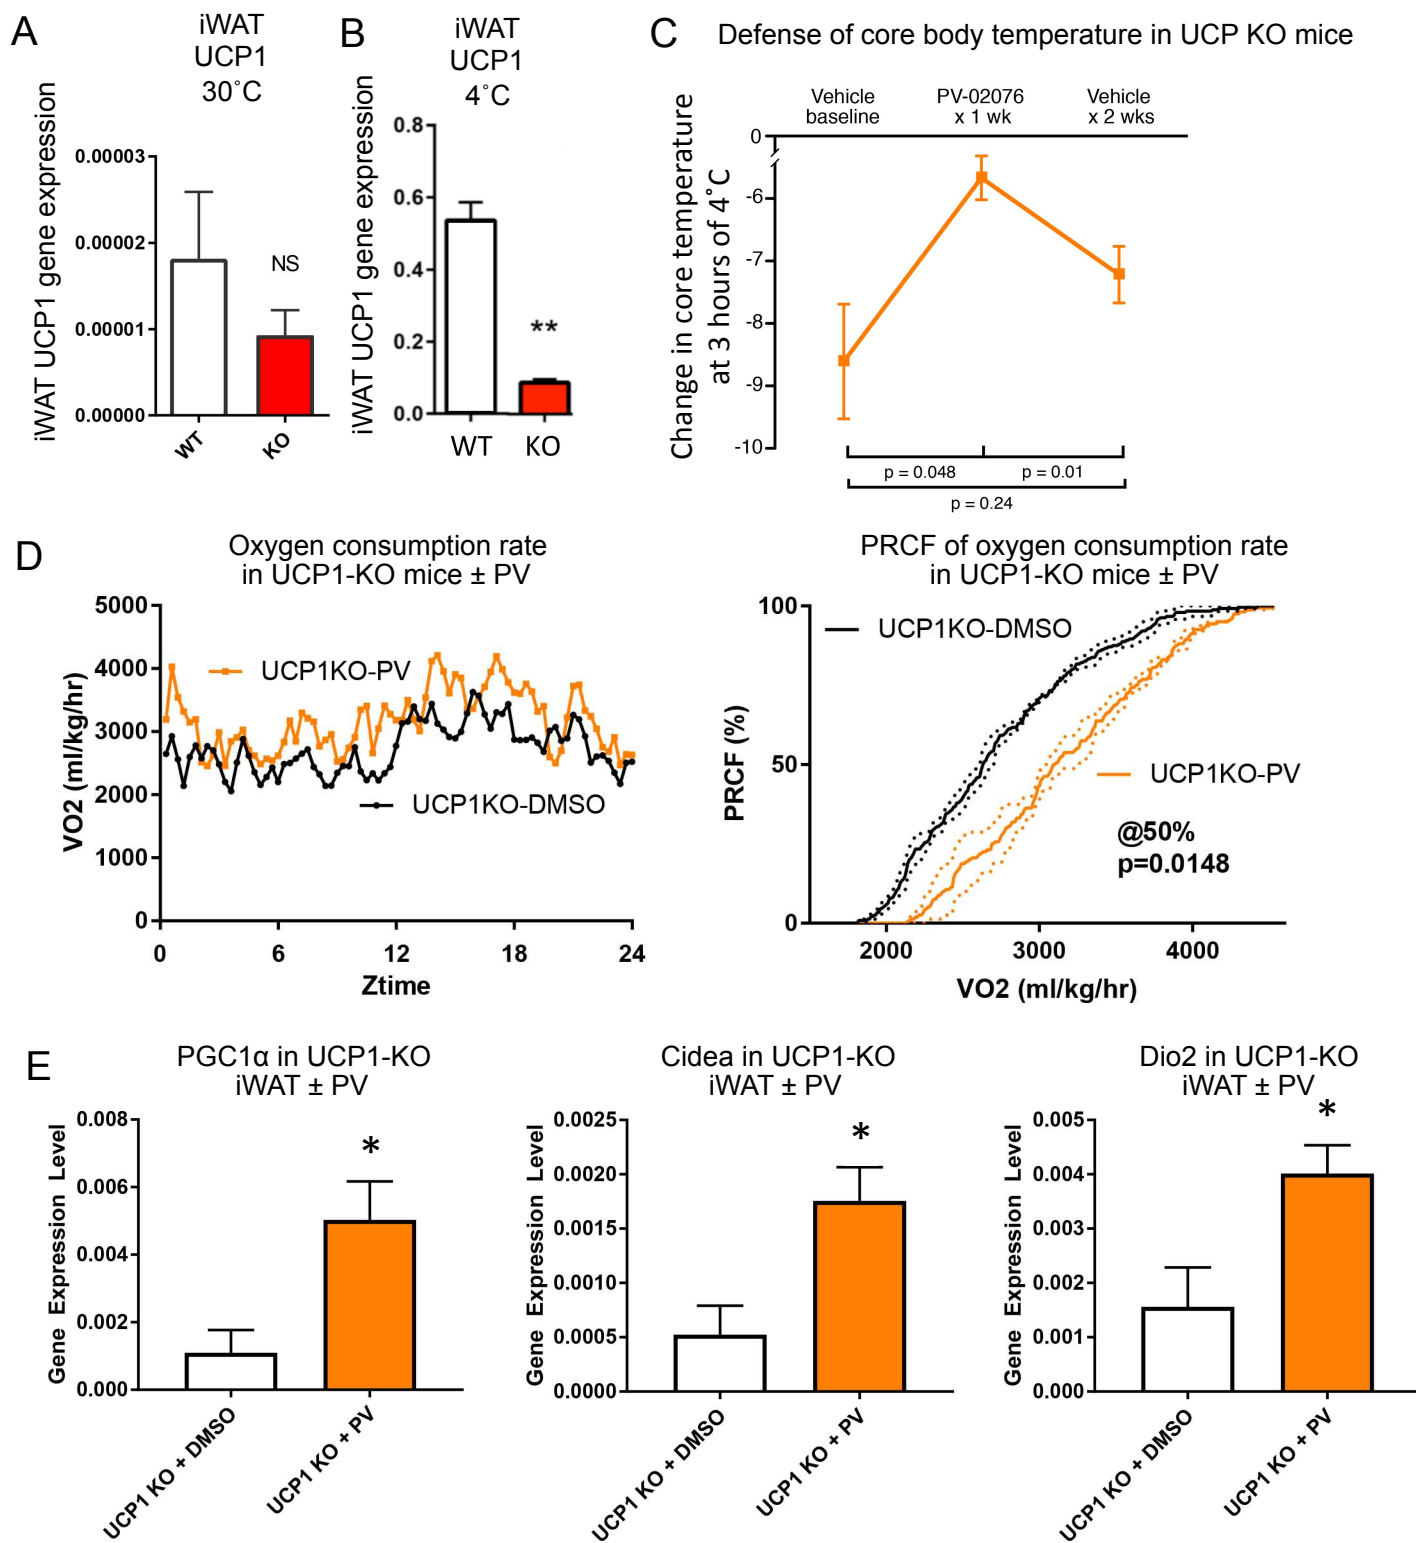

Pai et al Figure 4

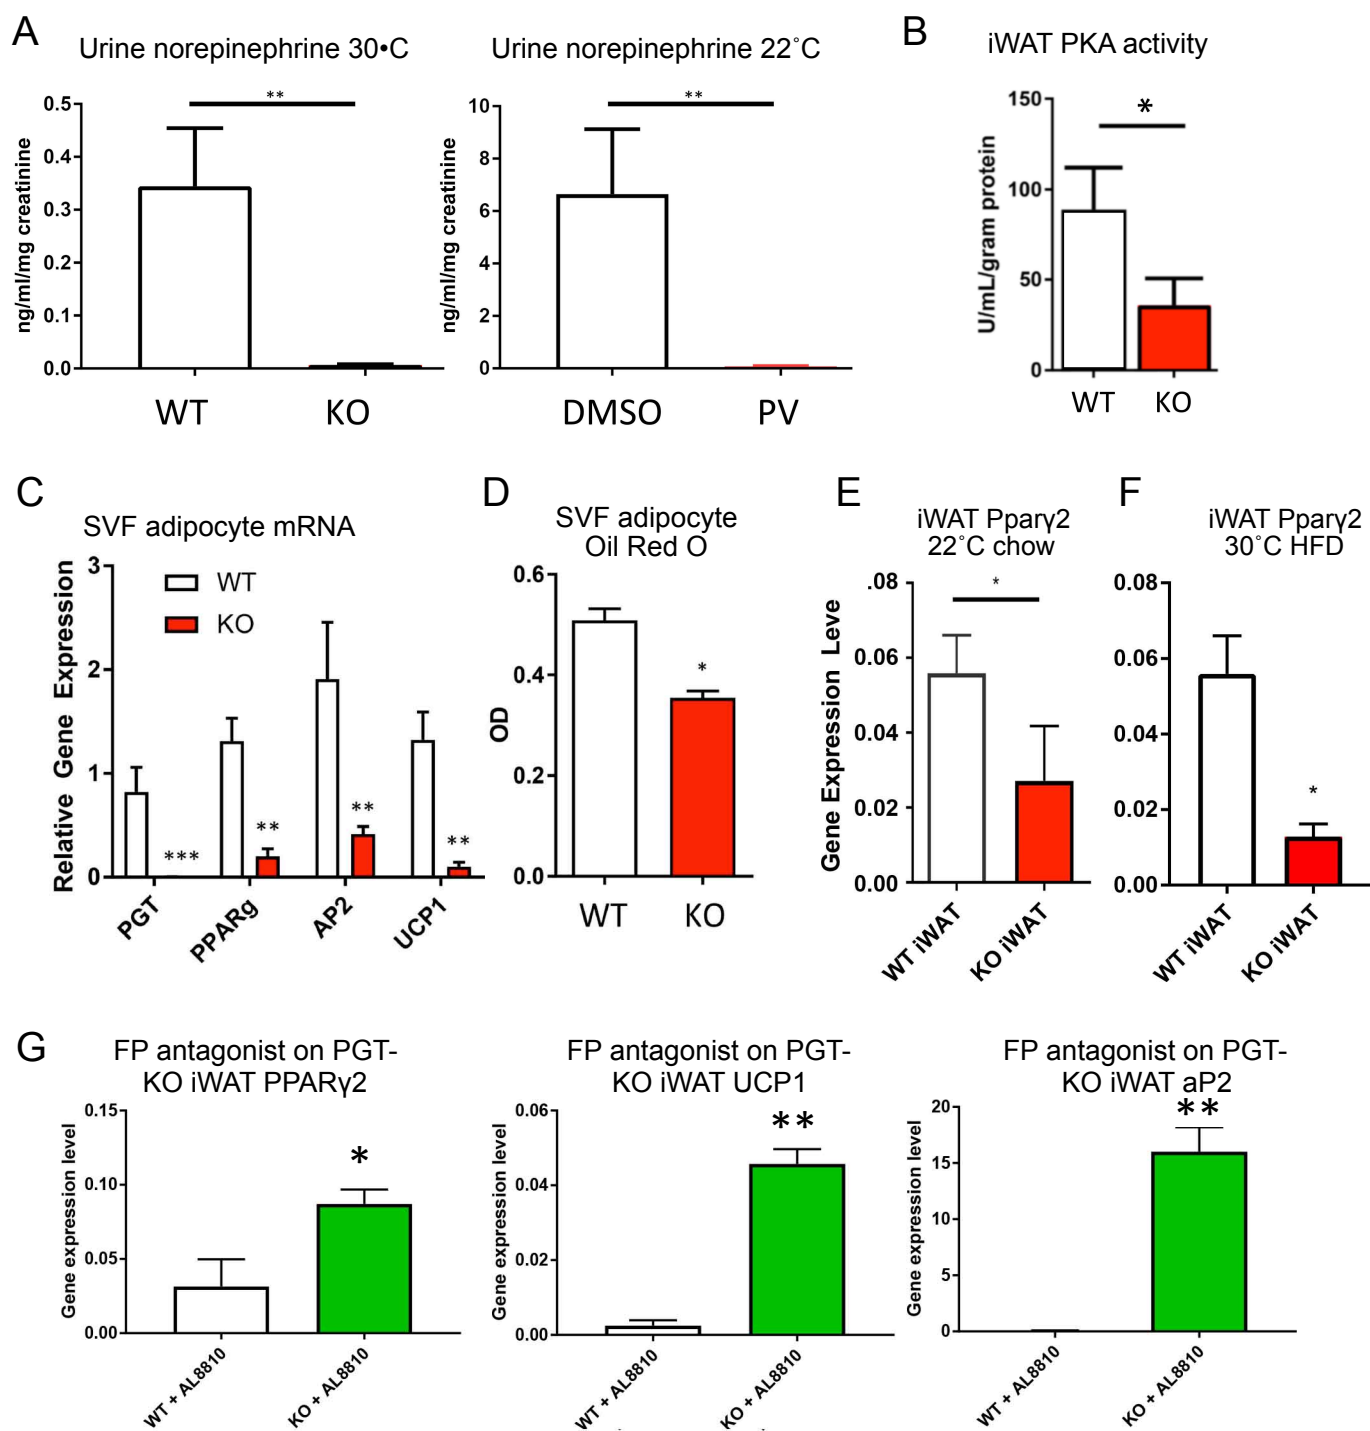

Pai et al Figure 5



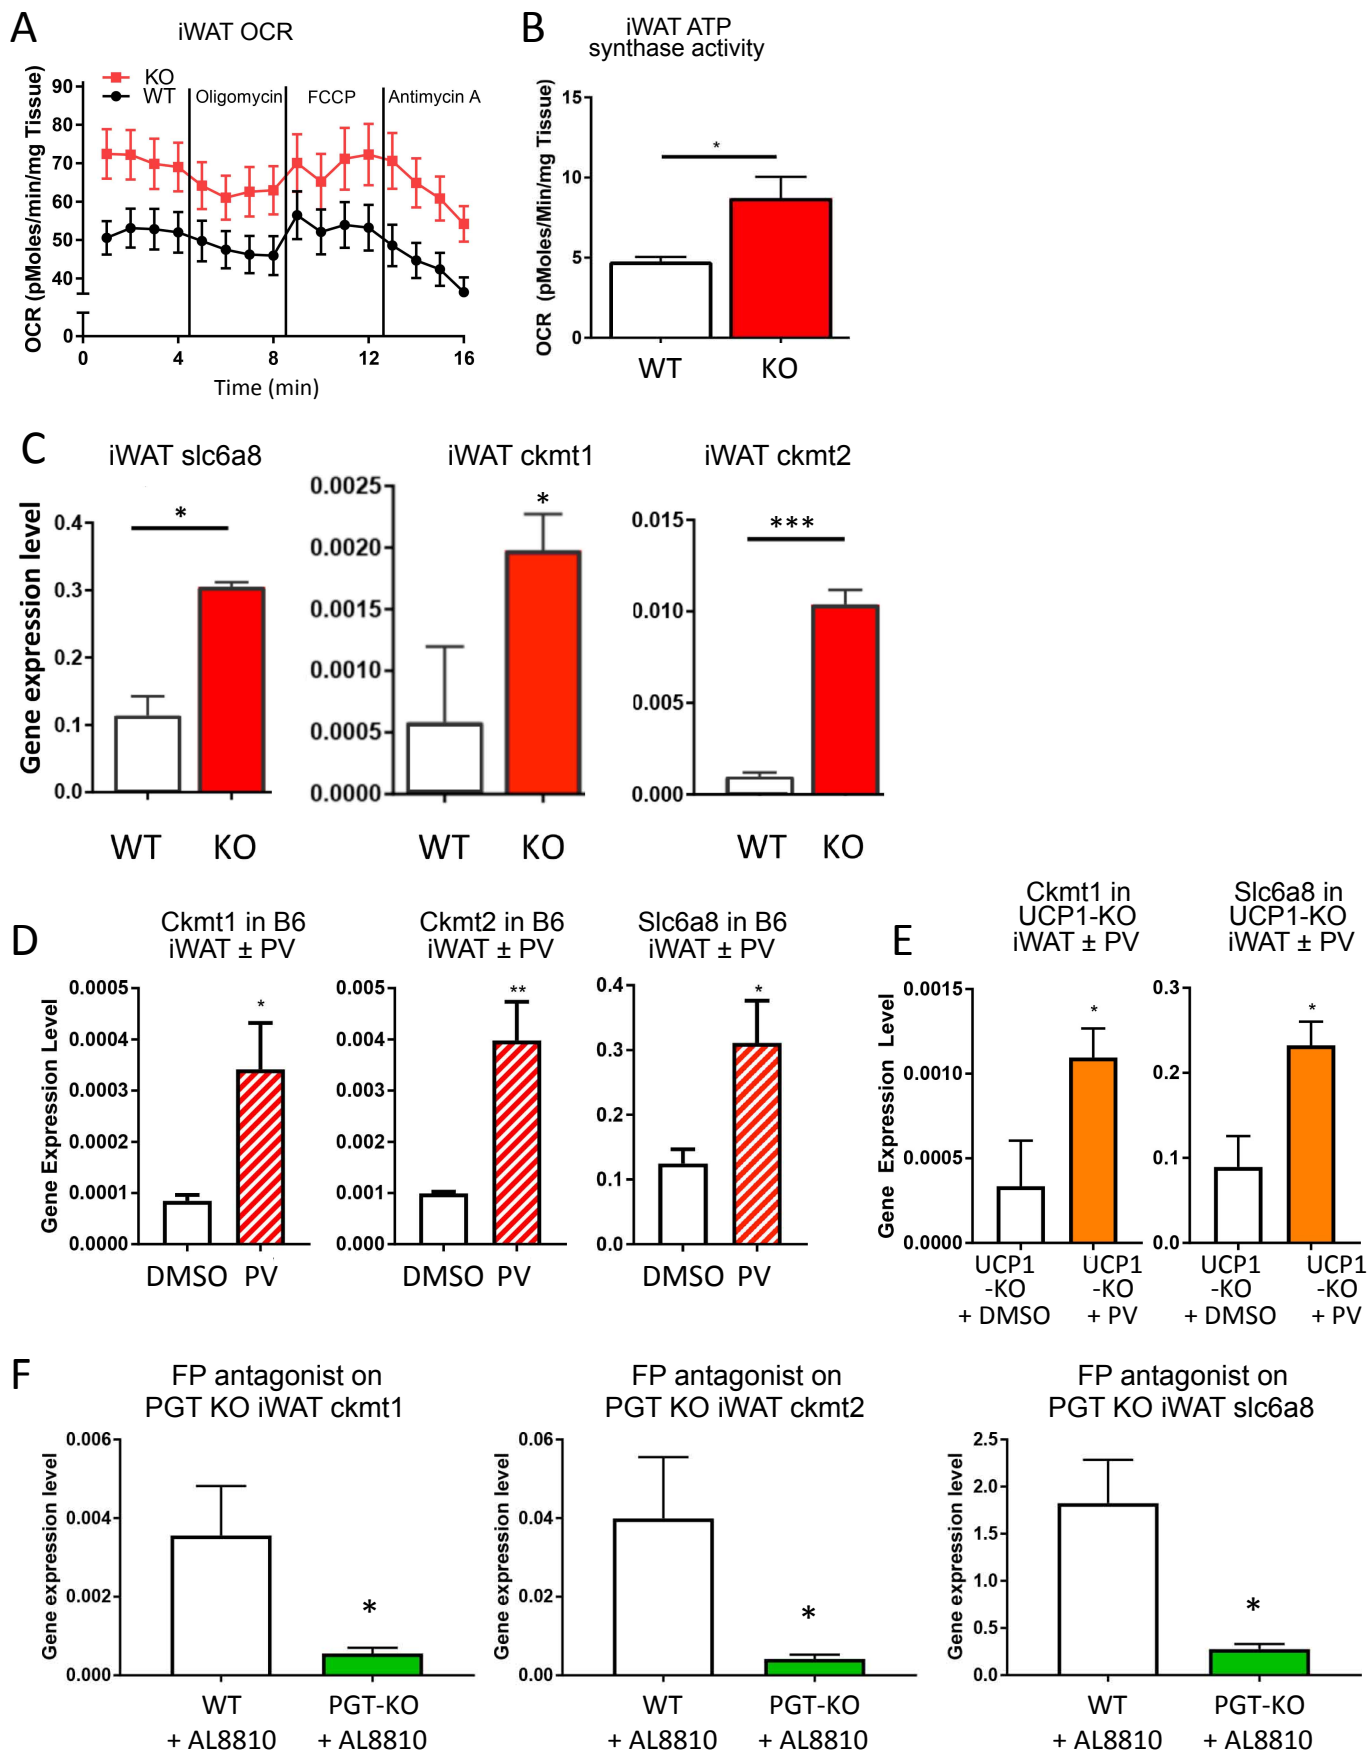

Pai et al Figure 6

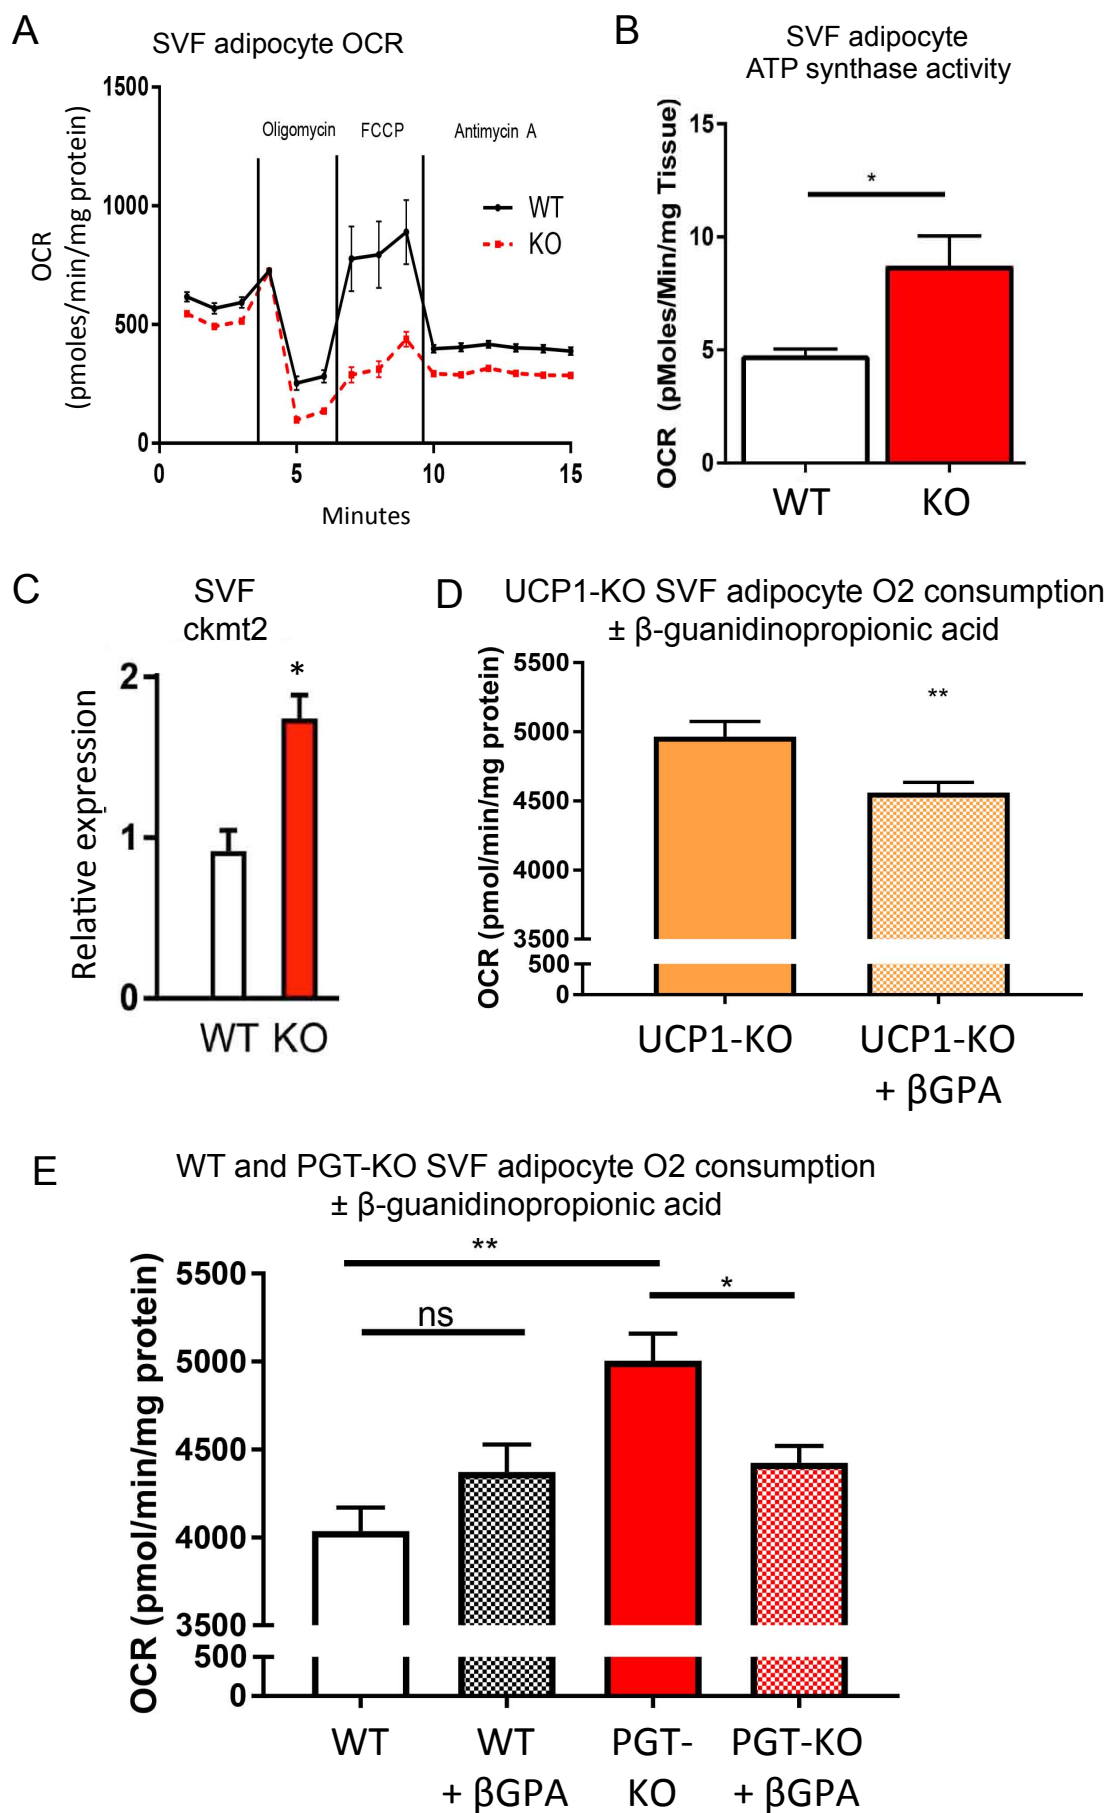

Source: https://www.biorxiv.org/content/10.1101/836288v1.full.pdf
